35 **ABSTRACT**

36 Pattern recognition is a major scientific topic. Strikingly, while machine learning algorithms  
37 are constantly refined, the human brain emerges as an ancestral biological example of such  
38 complex procedure. However, how it transforms sequences of single objects into meaningful  
39 temporal patterns remains elusive. Using magnetoencephalography (MEG) and magnetic  
40 resonance imaging (MRI), we discovered and mathematically modelled an inherited dual  
41 simultaneous processing responsible for pattern recognition in the brain. Indeed, while the  
42 objects of the temporal pattern were independently elaborated by a local, rapid brain  
43 processing, their combination into a meaningful superordinate pattern depended on a  
44 concurrent global, slower processing involving a widespread network of sequentially active  
45 brain areas. Expanding the established knowledge of neural information flow from low- to  
46 high-order brain areas, we revealed a novel brain mechanism based on simultaneous activity  
47 in different frequency bands within the same brain regions, highlighting its crucial role  
48 underlying complex cognitive functions.

49

50

51

52

53

54

55

56

57

58

## 59 *Introduction*

60 Pattern recognition has gathered a large interest across all scientific fields. Indeed, as a  
61 consequence of technological developments, nowadays scientists can rely on constantly  
62 growing amount of data and computational power<sup>1,2</sup>. This has introduced new exciting  
63 opportunities, pushing research to seek complex patterns that emerged in a variety of different  
64 fields, spanning from quantum physics<sup>3</sup> to weather forecast<sup>4</sup>, animal and human behavior<sup>5,6</sup>,  
65 and medical imaging<sup>7,8</sup>.

66 Strikingly, while computer science constantly refines machine learning algorithms and  
67 artificial intelligence for pattern recognition, neuroscience proposes the human brain as an  
68 ancestral biological example of such complex procedure<sup>9-11</sup>. Indeed, to guarantee survival the  
69 brain urges to invariably learn and recognize patterns. Among others, brain research findings  
70 on synchronous visual patterns detection provided major advances about the brain mechanisms  
71 underlying face and object recognition<sup>12-15</sup>. These studies showed the key role of fusiform  
72 gyrus for face recognition and highlighted the cascade of events from primary visual cortex to  
73 higher-order associative areas underlying processing and recognition of visual objects<sup>16,17</sup>.

74 When investigating the neural responses to objects arranged over time, it has been  
75 demonstrated that the brain is able to automatically detect regularities in temporal patterns  
76 (sequences) of objects, even at a pre-attentive level<sup>18-20</sup>. This research, largely carried out in  
77 the auditory domain<sup>18</sup>, discovered automatic event-related potentials/fields (ERP/F) to deviant  
78 and standard stimuli such as N100, mismatch negativity (MMN)<sup>18,19</sup> and early right-anterior  
79 negativity (ERAN)<sup>21,22</sup>.

80 Additional studies in the context of auditory neuroscience and memory for sounds arranged  
81 over time highlighted a network of brain areas supposedly involved in storing and retrieving  
82 acoustic information, comprising auditory cortex, inferior frontal gyrus and hippocampus<sup>23-</sup>  
83<sup>26</sup>. These works, which mainly employed functional magnetic resonance imaging (fMRI),  
84 returned pivotal results on auditory memory, and increased our knowledge on how the brain  
85 actively manipulates sounds and auditory information extended over time. Nonetheless, they  
86 did not unravel the fast-scale brain spatial-temporal dynamics responsible for conscious  
87 temporal pattern encoding and recognition.

88 Thus, despite decades of advancements in neuroscience, several open questions remain. In  
89 particular, how does the brain transform sequences of single objects (local processing) in

90 meaningful temporal patterns (global processing) which are accessible to human awareness?

91 What are the core spatial-temporal brain mechanisms behind temporal pattern recognition?

92 To address such crucial questions, in our study we investigated the brain activity during  
93 conscious recognition of auditory patterns extended over time.

94

95

## 96 **Results**

97

### 98 **Experimental design and MEG sensors analysis**

99 To elaborate the ideal experimental design and stimuli, we employed the human activity that  
100 mostly acquires meaning by unfolding over time, namely music<sup>27</sup>. Indeed, after requesting 70  
101 participants to memorize a full musical piece composed by J.S. Bach, we presented them with  
102 a set of melodic excerpts taken from the piece and a series of new variations thereof (**Fig. 1A**).  
103 Those excerpts represented temporal patterns built by five objects (musical tones) that were  
104 listened by the participants and labelled as ‘previously memorized’ (M) or ‘novel’ (N), using  
105 a response pad. The experiment took place while their brain activity was measured through  
106 magnetoencephalography (MEG), a powerful machine which records neural activity with  
107 excellent time resolution (1-ms precision). In the first place, after preprocessing the MEG data  
108 (see **Fig. 1B** and Methods for details), we analyzed the brain activity underlying recognition of  
109 M vs N by using univariate tests for each MEG sensor and time-point and corrected for multiple  
110 comparisons with cluster-based Monte-Carlo simulations (MCS). This procedure returned a  
111 large significant cluster ( $p < .001$ , cluster size  $k = 2117$ , mean  $t$ -value = 3.29, time = 0.547 –  
112 1.180 s), showing stronger brain activity for M vs N. Moreover, the brain activity recorded  
113 over the MEG channels forming such significant cluster outlined a timeseries which presented  
114 two main frequency components. As shown in **Fig. S1A**, the faster frequency component  
115 peaked after the presentation of each of the objects forming the pattern, while the slower  
116 frequency component accompanied the whole pattern, peaking at its end. This evidence was  
117 further supported by the computation of complex Morlet wavelet transform on all MEG sensor  
118 data, which highlighted the main contribution of 1Hz and 4Hz to the MEG signal recorded  
119 during the task (**Fig. S1B**). Thus, our following analyses focused on two frequency bands  
120 defined around those main frequencies: 0.1-1Hz and 2-8Hz. These bands roughly corresponded  
121 to the well-known brain waves called delta and theta, respectively<sup>28</sup>, and were also coherent  
122 with results reported by Bonetti and colleagues<sup>29,30</sup>. Importantly, we hypothesized that they  
123 indexed the two main processes involved in our experimental task: processing of single objects  
124 forming the temporal pattern (*i* - local processing) and recognizing the temporal pattern as a  
125 comprehensive superordinate object (*ii* - global processing).

126

127

## 128 Source reconstructed brain activity and single-object analysis

129 MEG is a powerful tool to record whole-brain activity with excellent temporal resolution.  
130 However, the investigation of neural activity also requires reliable spatial parameters. To  
131 achieve such goal, we performed the widely adopted procedure named source reconstruction,  
132 implemented through a beamforming algorithm. As shown in **Fig. 1B**, we band-pass filtered  
133 the MEG continuous data in the previously mentioned frequency bands (0.1-1Hz, delta, and 2-  
134 8Hz, theta). Then, independently for the two bands, the MEG data was epoched and co-  
135 registered (**Fig. 1C**) with the structural images of the participants' brains (structural weighted  
136 T1) obtained from magnetic resonance imaging (MRI). Finally, using beamforming, we  
137 reconstructed the neural sources of the MEG signal in an 8-mm space, returning 3559 brain  
138 sources (voxels) and the timeseries showing their activity over time (see **Fig. 1C** and Methods  
139 for details).

140 The reconstructed brain activity of each participant was submitted to first-level analysis, which  
141 was conducted employing general linear models (GLMs). Such models were computed for  
142 each time-point and brain voxel, returning the main effect (contrasts of parameters estimate  
143 (COPEs)) of M and N as well as their contrast<sup>31</sup>. These results were submitted to second level  
144 (group-level) analysis, employing one-sample t-tests with spatially smoothed variance  
145 obtained with a Gaussian kernel (full-width at half-maximum: 50 mm). This analysis returned  
146 the group-level statistics over all participants for each time-point and brain voxel,  
147 independently for our two frequency bands.

148 Then, we aimed to investigate the brain activity underlying the local processing of each of the  
149 objects forming the temporal pattern (theta) as well as the simultaneous global processing of  
150 the whole pattern (delta). Thus, we computed 10 (five tones x two frequency bands) cluster-  
151 based MCS on the group-level results averaged over the five time-windows corresponding to  
152 the duration of the musical tones. The MCS analysis comprised 1000 permutations and a cluster  
153 forming threshold of  $p < .05$  (from the group-level analysis). Since we computed this analysis  
154 10 times, we corrected for multiple comparisons by dividing the standard MCS  $\alpha$  level (= .05)  
155 by our 10 comparisons, resulting in an updated MCS  $\alpha = .005$  (i.e. clusters of significant group-  
156 level results in the original data were significant if their sizes were larger than the 99.5% of the  
157 cluster sizes of the permuted data; see Methods for additional details).

158 Notably, different results emerged for the two frequency bands. Brain activity for delta was  
159 stronger for M vs N, especially during processing of the last three objects of the pattern. As

160 depicted in **Fig. 1D** and **S2**, such activity delineated a widespread brain network underlying  
 161 the global processing of the pattern, involving brain regions related to memory and evaluative  
 162 processes such as cingulate gyrus, hippocampus, insula, frontal operculum and inferior  
 163 temporal cortex (MCS  $p < .001$ ). Conversely, brain activity for theta was overall stronger for  
 164 N vs M and mainly involved auditory cortices (MCS  $p < .001$ ). Statistics of the peak significant  
 165 brain voxels for both frequencies are reported in **Table 1**, while extensive results are described  
 166 in **Table S1**.

167

168

169

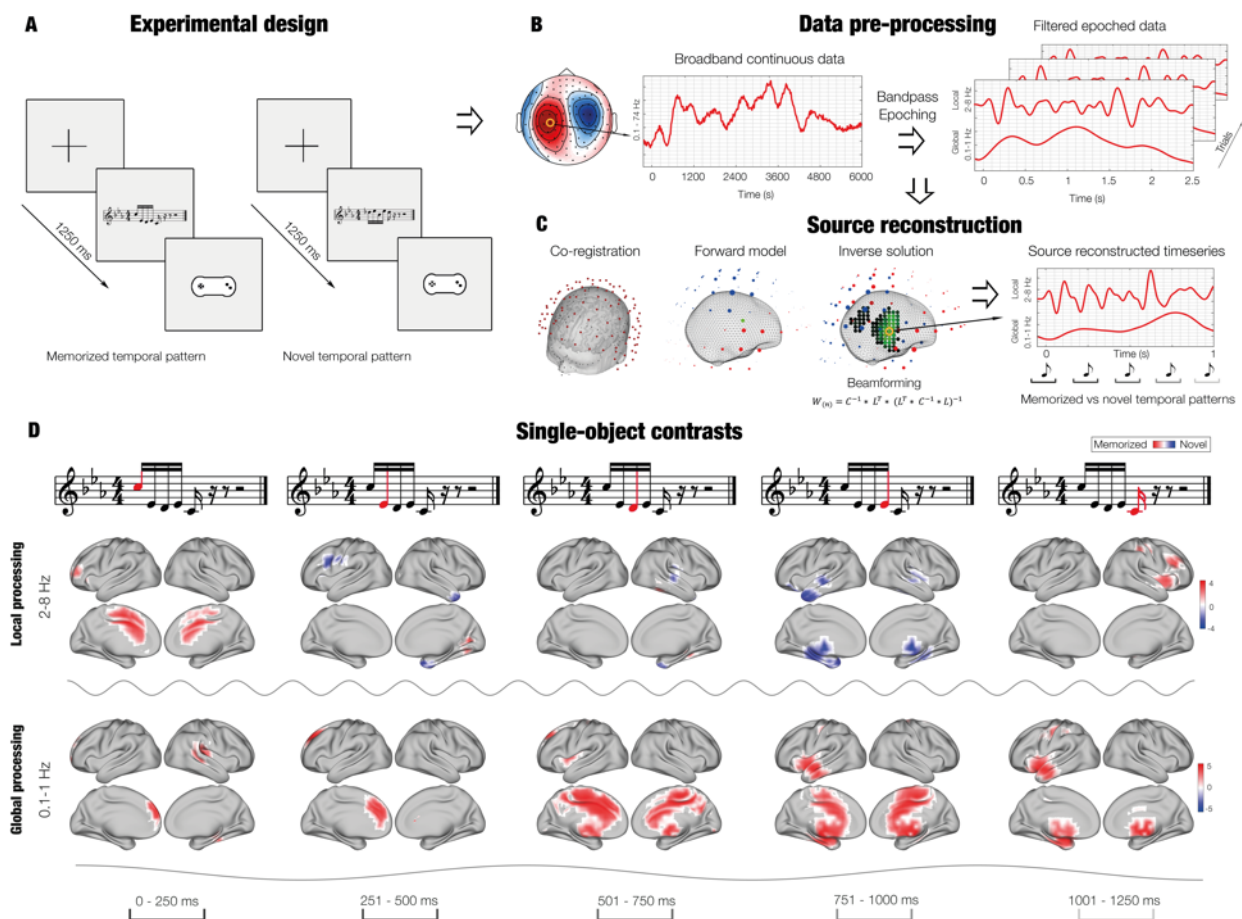

170

171 **Fig. 1. Experimental design, source reconstruction and single-object contrasts.** (A) After listening to a full  
 172 musical piece composed by J.S. Bach, participants were presented with a set of melodic excerpts taken from the  
 173 piece and a series of new variations thereof. Those excerpts represented temporal patterns built by five objects  
 174 (musical tones) that were labelled by the participants as ‘previously memorized’ (M) or ‘novel’ (N) using a  
 175 response pad. (B) During the task, participant’s brain activity was recorded through MEG. The neural data was

176 *preprocessed, bandpass-filtered in two frequency bands (0.1-1Hz and 2-8Hz) and epoched. (C) Graphical*  
177 *depiction of source reconstruction, computed independently for the two frequency bands considered in the study.*  
178 *Notably, the slower band (0.1-1Hz) indexed the recognition of the whole pattern (global processing), while the*  
179 *faster band (2-8Hz) showed the neural responses to each object of the pattern (local processing). (F). Contrasts*  
180 *revealed stronger brain activity for M vs N in 0.1-1Hz (red), especially for third, fourth and fifth objects. Such*  
181 *difference was localized in a large brain network comprising cingulum, inferior temporal cortex, frontal*  
182 *operculum, insula and hippocampal areas. Conversely, contrasts for 2-8Hz returned an overall stronger activity*  
183 *for N vs M (blue), especially in the auditory cortex.*

184

185

186

187



188

| 0.1 – 1 Hz    |         |      |                 |     |     | 2 – 8 Hz        |         |       |                 |     |     |
|---------------|---------|------|-----------------|-----|-----|-----------------|---------|-------|-----------------|-----|-----|
| Brain area    | Hemisph | t    | MNI coordinates |     |     | Brain area      | Hemisph | t     | MNI coordinates |     |     |
|               |         |      | x               | y   | z   |                 |         |       | x               | y   | z   |
| <b>Tone 1</b> |         |      |                 |     |     |                 |         |       |                 |     |     |
| Rolandic Ope  | R       | 4.44 | 42              | -30 | 16  | Cing Mid        | R       | 4.48  | 2               | 2   | 40  |
| Heschl        | R       | 4.26 | 42              | -30 | 8   | Cing Mid        | R       | 4.23  | 2               | 10  | 40  |
| Temporal Sup  | R       | 4.16 | 50              | -30 | 16  | Cing Mid        | L       | 4.17  | -6              | 2   | 40  |
| Temporal Sup  | R       | 4.04 | 42              | -38 | 16  | Cing Mid        | R       | 4.16  | 2               | 10  | 32  |
| <b>Tone 2</b> |         |      |                 |     |     |                 |         |       |                 |     |     |
| Frontal Sup   | L       | 4.00 | -14             | 34  | 40  | Temp Pol Sup    | R       | -3.88 | 34              | 10  | -32 |
| Frontal Sup   | L       | 3.98 | -14             | 34  | 32  | Temp Pol Sup    | R       | -3.46 | 26              | 10  | -32 |
| Frontal Sup   | L       | 3.92 | -14             | 26  | 40  | Front Inf Ope   | L       | -3.45 | -38             | 2   | 24  |
| Frontal Sup   | L       | 3.78 | -14             | 42  | 40  | Temp Pol Mid    | R       | -3.37 | 42              | 10  | -32 |
| <b>Tone 3</b> |         |      |                 |     |     |                 |         |       |                 |     |     |
| Precuneus     | R       | 3.89 | 2               | -46 | 48  | Temporal Sup    | R       | -3.30 | 50              | -22 | 8   |
| Cing Mid      | R       | 3.80 | 2               | -38 | 48  | Temporal Sup    | R       | -3.19 | 58              | -22 | 8   |
| Cing Mid      | R       | 3.62 | 2               | -22 | 48  | Temporal Sup    | R       | -2.78 | 50              | -22 | 0   |
| Cing Mid      | R       | 3.60 | 2               | -30 | 48  | Heschl          | R       | -2.67 | 42              | -22 | 8   |
| <b>Tone 4</b> |         |      |                 |     |     |                 |         |       |                 |     |     |
| Temporal Mid  | L       | 5.05 | -46             | -6  | -16 | ParaHippocamp   | L       | -3.89 | -22             | -30 | -16 |
| Insula        | L       | 4.93 | -38             | -6  | -8  | ParaHippocamp   | L       | -3.86 | -30             | -30 | -16 |
| Temporal Mid  | L       | 4.81 | -46             | -14 | -16 | Temp Pol Mid    | L       | -3.74 | -46             | 10  | -32 |
| Cing Mid      | R       | 4.76 | 2               | -6  | 40  | Temp Pol Mid    | L       | -3.70 | -38             | 10  | -32 |
| <b>Tone 5</b> |         |      |                 |     |     |                 |         |       |                 |     |     |
| Insula        | L       | 5.48 | -38             | 2   | -8  | Front Inf Tri   | R       | 3.41  | 42              | 26  | 24  |
| Putamen       | L       | 5.27 | -30             | 2   | -8  | Putamen         | R       | 3.36  | 34              | 2   | 0   |
| Temporal Mid  | L       | 5.26 | -46             | -6  | -16 | Insula          | R       | 3.28  | 42              | 10  | 0   |
| Temp Pol Mid  | L       | 5.24 | -46             | 2   | -16 | Postcentral Gyr | R       | 3.23  | 34              | -30 | 48  |

189 **Table 1.** Peak brain activity underlying recognition of each object (musical tone) of the temporal sequences.  
 190 Brain areas refer to the automatic anatomic labelling (AAL) parcellation labels, while *t* indicates the *t*-value  
 191 obtained by contrasting known vs unknown temporal sequences.

192

### 193 **K-means functional clustering**

194 Although returning large significant brain networks and valuable information, contrasting the  
195 brain activity in response to each object of the pattern did not fully benefit from the excellent  
196 temporal resolution of the MEG data and underestimated brain processes happening in between  
197 two or more objects of the pattern. Furthermore, computing contrasts for each time-point and  
198 brain voxel returns a large amount of data which is partially redundant and sometimes not  
199 straightforward to understand and ideal to mathematically model. Indeed, several brain sources  
200 are highly correlated because of both biological reasons involving large populations of neurons  
201 generating the signal and artificial source leakage introduced during the source reconstruction  
202 <sup>32</sup>. Thus, defining a functionally based parcellation of the brain is of great importance when  
203 aiming to synthesize and mathematically describe the spatial extent of the active brain sources  
204 as well as their activity over time.

205 We used a so-called k-means functional clustering, which relies on the combination of k-means  
206 clustering computed both on functional and spatial information of each of the reconstructed  
207 brain voxel timeseries (**Fig. 2A**). In brief, first this procedure clusters the 3559 brain voxels in  
208  $n$  functional parcels according to basic functional features, such as the absolute value of the  
209 peaks of the voxels timeseries (**Fig. 2B**, right) or their corresponding time-indices (**Fig. 2B**,  
210 left). Notably, in our study, delta presented different peaks of activity shifted over time and  
211 thus was clustered considering the time-indices of such peaks (**Fig. 2B**, left). Differently, theta  
212 showed very correlated activity and was therefore clustered using the absolute values of such  
213 peak activity (**Fig. 2B**, right). Second, each of the returned  $n$  functional parcels is further  
214 divided according to the spatial information (three-dimensional coordinates) of the brain voxels  
215 that belong to it (**Fig. 2C**). The whole procedure provides a final parcellation and the  
216 corresponding timeseries based on both the functional and spatial profile of each of the  
217 reconstructed 3559 brain voxels (examples of this procedure are depicted in **Fig. S3, S4** and  
218 **S5** and described in detail in the Methods and in **Tables S2, S3, S4** and **S5, S6**).

219 Here, we wanted to contrast the brain activity of M vs N over the functionally defined parcels,  
220 aiming to integrate our previous statistical analysis. Thus, the k-means functional clustering  
221 was performed on the group-level main effects of M and N averaged together. Then, to obtain  
222 the main effect of M and N for each parcel and participant, we averaged the first-level main  
223 effect of M and N (from the GLMs) over the brain voxels belonging to each of the functional  
224 parcels. This resulted in a new timeseries for each participant, functional parcel, and  
225 experimental condition (M and N). Such timeseries were submitted to univariate contrasts (M  
226 vs N), performed for each parcel and time-point (**Fig. 2D1**). Once again, the significant results

227 were corrected for multiple comparisons using cluster based MCS (see Methods for details).  
228 These analyses were computed independently for the two frequency bands, returning a  
229 different picture for global and local temporal pattern brain processing. Similar to our previous  
230 analysis, the strongest brain activity in the delta band was detected for M. Remarkably, the  
231 current procedure highlighted a series of sequentially active brain parcels accompanying the  
232 processing of the temporal pattern, expanding our first analysis. As shown in **Figure 2E**, the  
233 brain presented an initial activity in the right auditory cortex characterized by a slightly stronger  
234 power for M vs N (**Fig. 2A1**, parcel 1:  $p < .001$ , cluster size  $k = 39$ ; mean  $t$ -value = 2.72; time  
235 from first object onset: 0-0.25s). Next, we observed neural activity in the left auditory cortex  
236 but no significant differences between experimental conditions (**Fig. 2E**, parcel 2). Starting  
237 between the second and third objects and peaking during the fifth object of the temporal pattern,  
238 we observed a burst of activity in the cingulate gyrus, which was stronger for M vs N (**Fig. 2E**,  
239 parcel 3:  $p < .001$ ,  $k = 92$ ;  $t$ -val = 2.73; time: 0.45-1.05s). With a slight delay, a similar profile  
240 emerged for a larger brain parcel comprising insula, the anterior part of the inferior temporal  
241 cortex, hippocampus and frontal operculum. Once again, M was largely stronger than N (**Fig.**  
242 **2E**, parcel 4:  $p < .001$ ,  $k = 77$ ;  $t$ -val = 2.79; time: 0.69-1.19s). Finally, peaking just before the  
243 mean reaction time for participants' categorization of the pattern, a stronger activity in post-  
244 central gyrus and sensorimotor cortex was observed for M vs N (**Fig. 2E**, parcel 5, main cluster:  
245  $p < .001$ ,  $k = 142$ ;  $t$ -val = 2.68; time: 0.94-1.88s).

246 Conversely, the analysis for theta band showed a number of significant clusters of stronger  
247 activity for N vs M around the sharp peaks of the timeseries. Notably, compared to our first  
248 analysis for the five objects of the temporal pattern, this second procedure clearly outlined the  
249 temporal extent of such difference, which corresponded to the last three tones of the temporal  
250 sequences. Specifically, such differences involved right (**Fig. 2E**, parcel 1, main cluster I:  $p <$   
251  $.001$ ,  $k = 11$ ,  $t$ -val = 3.51; time: 0.89-0.95s; II:  $p < .001$ ,  $k = 11$ ;  $t$ -val = 2.22; time: 1.21-1.28s)  
252 and left primary auditory cortices (**Fig. 2E**, parcel 2, main cluster I:  $p < .001$ ,  $k = 12$ ,  $t$ -val = -  
253 3.70; time: 0.74-0.81s; II:  $p < .001$ ,  $k = 12$ ;  $t$ -val = 3.09; time: 0.87-0.95s; III:  $p < .001$ ,  $k = 9$ ;  
254  $t$ -val = 2.90; time: 0.64-0.69s). With a reduced strength, similar clusters of activity have been  
255 observed for right (**Fig. 2E**, parcel 3, main cluster I:  $p < .001$ ,  $k = 13$ ,  $t$ -val = 3.08; time: 1.19-  
256 1.27s; II:  $p < .001$ ,  $k = 12$ ;  $t$ -val = 3.61; time: 0.89-0.96s) and left secondary auditory cortex  
257 and hippocampal areas (**Fig. 2E**, parcel 4, main cluster I:  $p < .001$ ,  $k = 12$ ,  $t$ -val = -2.97; time:  
258 0.74-0.81s; II:  $p < .001$ ,  $k = 10$ ;  $t$ -val = 2.86; time: 0.87-0.93s) and cingulate (**Fig. 2E**, parcel  
259 5, main cluster I:  $p < .001$ ,  $k = 10$ ,  $t$ -val = 3.03; time: 0.90-0.96s; II:  $p < .001$ ,  $k = 9$ ;  $t$ -val = -

260 2.29; time: 0.79-0.84s). Additional details on these contrasts are reported in **Tables S7**, and  
261 extensively depicted in **Fig. S6** and **S7**.

262

### 263 **Modelling the brain activity underlying temporal pattern recognition**

264 Once the difference between M and N was largely proved and detailly described, we focused  
265 on a further aim of the study, which was to mathematically characterize the dual simultaneous  
266 brain processing happening during recognition of the previously memorized temporal patterns.  
267 Thus, we computed another round of k-means functional clustering. This time, such analysis  
268 was performed only on the group-level main effect of M, to outline a functional parcellation  
269 based on the sole recognition of previously memorized patterns. As shown in **Fig. 2F**, the  
270 algorithm returned similar results compared to the previous round of k-means functional  
271 clustering, but better highlighted the parcels comprising brain areas implicated in memory and  
272 evaluative processes.

273 With regards to modelling, we hypothesized two different mathematical equations (one for  
274 each frequency band) that could describe the brain activity over our functionally defined  
275 parcels for global and local brain processes (**Fig. 2D2**, bottom).

276

277

278

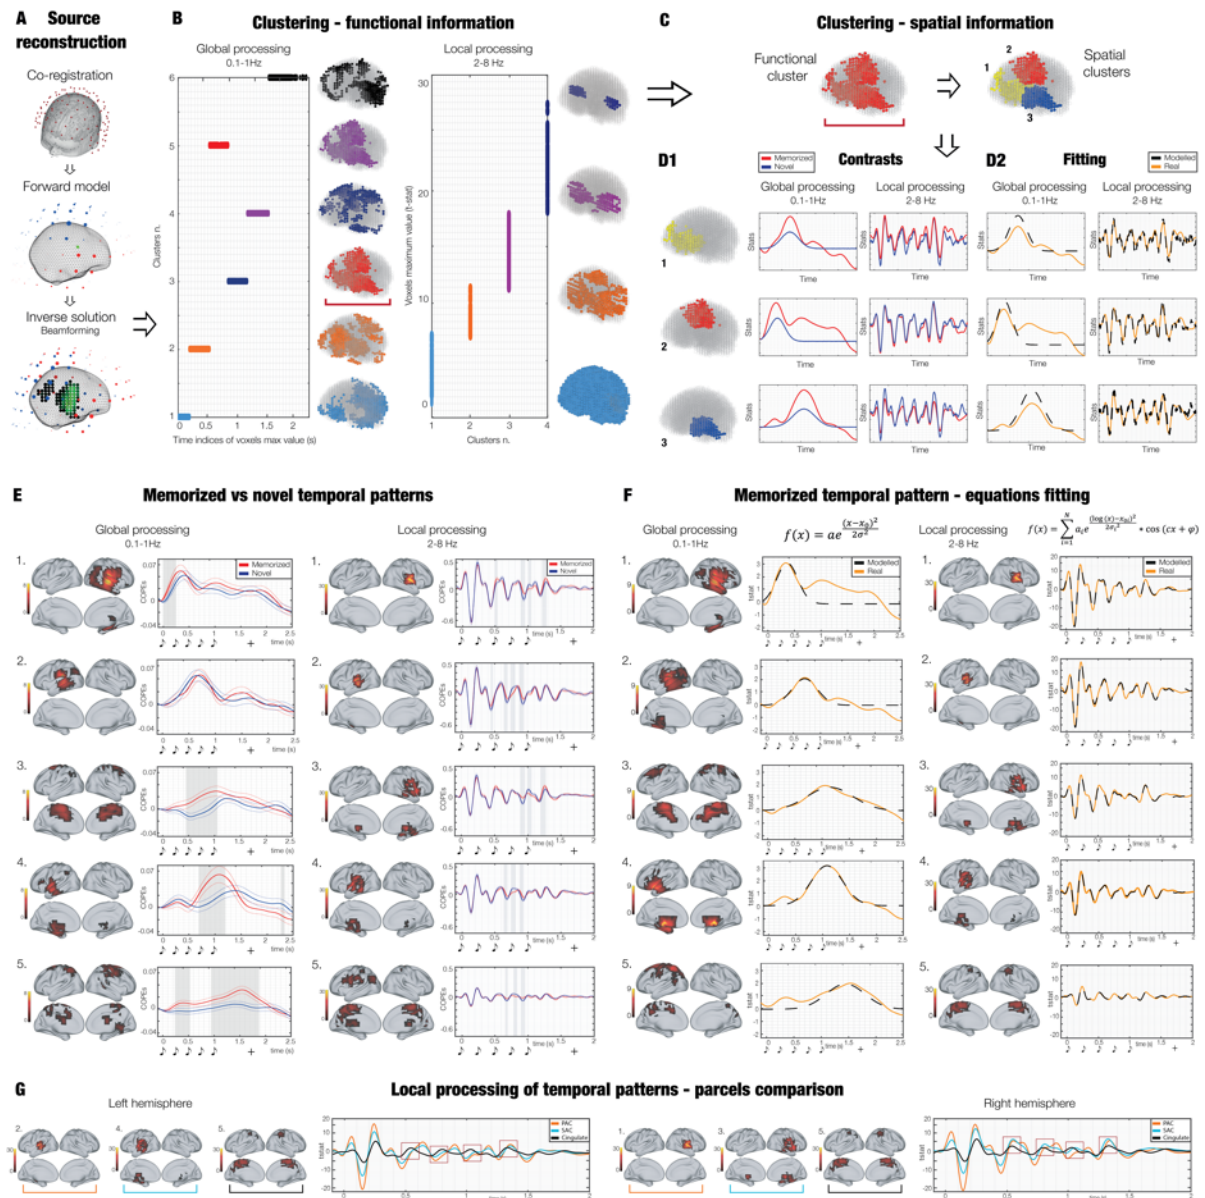

279

280 **Fig. 2. Source reconstruction, k-means functional clustering, contrasts and mathematical modelling.** (A), (B),  
 281 (C) provide a graphical depiction of the methods used, while (E), (F), (G) show actual results. (A) Graphical  
 282 depiction of the source reconstruction. (B) A functional parcellation of the brain based on the activity recorded  
 283 during the task was estimated. First, k-means clustering was computed on functional information of each brain  
 284 voxel timeseries. Regarding the slower band (0.1-1Hz, indexing the global processing of the pattern), clustering  
 285 was computed on the time indices of the maximum values of the voxels. Conversely, for the faster band (2-8Hz,  
 286 indexing the local processing of each object of the pattern), clustering was performed on the maximum values of  
 287 the voxels. This procedure returns a set of functional parcels. (C) A second series of k-means clustering was  
 288 computed on the spatial properties of each of the functional parcels described in (B). Here, for illustrative  
 289 purposes, we show only one functional parcel (outlined by the red bracket). Such procedure returned a set of new  
 290 final parcels with the corresponding timeseries taking into account both functional and spatial information of

291 *each of the brain voxels. (D1) Contrasts between memorized (M) and novel (N) temporal patterns were computed*  
292 *for each parcel and frequency band. (D2) Gaussian and sinusoidal functions were fitted to the timeseries of the*  
293 *parcels computed for M only, using the non-linear least square algorithm. (E) Contrasts between M vs N temporal*  
294 *patterns for the main functional brain parcels. (F) Real and predicted timeseries for M computed by fitting the*  
295 *mathematical equation depicted in the top column to the parcels timeseries. (G) Deepening on three main parcels*  
296 *(primary auditory cortex (PAC), secondary auditory cortex and hippocampal areas (SAC) and cingulate) of the*  
297 *local processing. The image highlights the different behavior of PAC vs SAC and Cingulate, especially in the right*  
298 *hemisphere. It shows that higher-order areas (SAC and Cingulate) are more implicated than lower order ones*  
299 *(PAC) in the generation of the P300 component in response to each sound of the pattern (as outlined by the red*  
300 *squares). In (E), (F), (G) graphical depiction of musical tones indicates the onset of the objects forming the*  
301 *temporal pattern, while the '+' shows the mean reaction time of participants' response. Colorbars refer to the t-*  
302 *values obtained from second-level analyses.*

303

304

305



306

| 0.1 – 1 Hz |                |      |                |       | 2 - 8Hz  |                             |   |                |                 |                |                |                |
|------------|----------------|------|----------------|-------|----------|-----------------------------|---|----------------|-----------------|----------------|----------------|----------------|
| Parcel #   | R <sup>2</sup> | a    | x <sub>0</sub> | σ     | Parcel # | R <sup>2</sup> <sub>i</sub> | i | a <sub>i</sub> | x <sub>0i</sub> | σ <sub>i</sub> | c <sub>i</sub> | φ <sub>i</sub> |
| 1          | 0,10           | 3,68 | 69,79          | 30,11 | 1        | 0,99                        | 1 | -5,52          | -1,18           | 0,05           | -0,75          | 1,72           |
|            |                |      |                |       |          |                             | 2 | 14,82          | 3,72            | 0,75           | 0,16           | 3,40           |
|            |                |      |                |       |          |                             | 3 | -18,24         | 3,75            | 0,27           | 0,21           | -0,45          |
|            |                |      |                |       |          |                             | 4 | -2,64          | 4,48            | 0,52           | 0,33           | -7,42          |
|            |                |      |                |       |          |                             | 5 | 6,61           | 5,34            | 0,08           | 0,16           | -7,87          |
| 2          | 0,78           | 2,40 | 122,91         | 34,99 | 2        | 0,97                        | 1 | -5,52          | -1,18           | 0,05           | -0,75          | 1,72           |
|            |                |      |                |       |          |                             | 2 | 11,84          | 3,78            | 0,79           | 0,16           | 2,55           |
|            |                |      |                |       |          |                             | 3 | -27,29         | 3,73            | 0,29           | 0,19           | 0,09           |
|            |                |      |                |       |          |                             | 4 | -1,65          | 4,52            | 0,66           | 0,33           | -7,35          |
|            |                |      |                |       |          |                             | 5 | 7,06           | 5,39            | 0,07           | 0,16           | -9,00          |
| 3          | 0,92           | 2,12 | 186,79         | 63,61 | 3        | 0,97                        | 1 | -5,52          | -1,18           | 0,05           | -0,75          | 1,72           |
|            |                |      |                |       |          |                             | 2 | 13,73          | 3,81            | 0,60           | 0,16           | 2,96           |
|            |                |      |                |       |          |                             | 3 | -15,78         | 3,81            | 0,27           | 0,20           | 0,61           |
|            |                |      |                |       |          |                             | 4 | -1,84          | 4,23            | 0,69           | 0,33           | -7,90          |
|            |                |      |                |       |          |                             | 5 | 5,85           | 5,32            | 0,07           | 0,14           | -4,29          |
| 4          | 0,92           | 3,60 | 178,79         | 44,04 | 4        | 0,97                        | 1 | -5,52          | -1,18           | 0,05           | -0,75          | 1,72           |
|            |                |      |                |       |          |                             | 2 | 8,76           | 3,75            | 0,73           | 0,16           | 2,42           |
|            |                |      |                |       |          |                             | 3 | -19,57         | 3,73            | 0,29           | 0,19           | 0,50           |
|            |                |      |                |       |          |                             | 4 | -1,29          | 4,38            | 0,70           | 0,33           | -7,41          |
|            |                |      |                |       |          |                             | 5 | 4,70           | 5,38            | 0,07           | 0,17           | -10,13         |
| 5          | 0,78           | 2,25 | 232,61         | 52,83 | 5        | 0,96                        | 1 | -5,52          | -1,18           | 0,05           | -0,75          | 1,72           |
|            |                |      |                |       |          |                             | 2 | 4,52           | 3,82            | 0,25           | 0,19           | 2,39           |
|            |                |      |                |       |          |                             | 3 | -3,44          | 4,10            | 0,72           | 0,23           | -1,75          |
|            |                |      |                |       |          |                             | 4 | -5,90          | 4,43            | 0,22           | 0,21           | 2,84           |
|            |                |      |                |       |          |                             | 5 | 4,40           | 5,28            | 0,06           | 0,17           | -10,22         |

307 **Table 2.** R<sup>2</sup> and coefficients derived from non-linear least square fitting of the equations (1) and (3) on the brain  
 308 activity underlying temporal pattern recognition. *i* refers to the five objects (musical tones) forming the  
 309 temporal patterns. Here, the parcel IDs correspond to the ones reported in **Fig. 2A1** and **2A2**.

310

311

312

313 Regarding delta (global processing of the pattern), we used a simple Gaussian function,  
 314 described as follows:

315

$$f(x) = ae^{-\frac{(x-x_0)^2}{2\sigma^2}} \quad (1)$$

316

317 where *a* modulates the amplitude of the curve, *x*<sub>0</sub> shifts it over time and *σ* determines its width.

318 This equation was fitted using a widely adopted non-linear least square approach, whose results

319 are reported in **Table 2** and **S8** and depicted in **Fig. 2F** (left column), **S8** and **S9**. This procedure

320 returned rather good results, highlighting key similarities and differences between the parcels

321 timeseries. As reported in **Table 2**, the main functional parcels returned a similar peak

322 amplitude ( $a$ ). Conversely, the latencies of such peaks were highly different and shifted over  
323 time, as illustrated by parameter  $x_0$ . Further, the width of the Gaussian function (indexed by  $\sigma$ )  
324 varied over the parcels. Indeed, lower-level brain areas such as right and left auditory cortices  
325 presented a reduced width compared to higher-level brain areas such as cingulate, insula,  
326 hippocampus, inferior temporal cortex and frontal operculum. This result may suggest that the  
327 transition from low- to high-order brain areas at the basis of the global processing of the pattern,  
328 is also reflected in a longer computation of the information operated by the brain.

329 Conversely, with regards to theta (local processing of the objects forming the pattern), we  
330 hypothesized the following equation:

331

$$f(x) = \sum_{i=1}^N a_i e^{-\frac{(\log(x)-x_{0i})^2}{2\sigma_i^2}} * \cos(cx + \varphi) \quad (2)$$

332

333 where  $a$ ,  $x_0$ ,  $\sigma$  describes a Gaussian function, exactly as reported for equation (1). This new  
334 equation gives rise to a sinusoidal curve that modulates its amplitude on the basis of the  
335 associated Gaussian function. As usual,  $c$  refers to the angular frequency, while  $\varphi$  indicates the  
336 phase. Finally,  $N$  refers to the total number of objects forming the temporal pattern. This  
337 equation was hypothesized since it produces ‘wavelet-like’ timeseries, arguably describing the  
338 well-established series of components (peaks of activity in the timeseries, e.g. P50, N100,  
339 P300, N300<sup>33</sup>) generated by the brain in response to a sound. Indeed, such components have  
340 different latencies with respect to the sound onset and present opposite polarities (i.e. P50 and  
341 P300 are positive, while N100 and N300 are negative), giving rise to a wavelet-looking  
342 timeseries. Although well-established, it is not clear how these components relate to each other,  
343 especially when there are multiple brain sources involved and during complex cognitive  
344 processes such as recognition of temporal patterns. As done for equation (1), equation (2) was  
345 also fitted using the non-linear least square algorithm, returning good results (reported in **Table**  
346 **2** and **S8** and depicted in **Fig. 2F**, right column). However, in this case, the interpretation of  
347 the fitted parameters was more complicated since the brain responses to any two subsequent  
348 sounds was partially overlapping (i.e. the N300 component enhanced by the first sound  
349 occurred with a latency of approximately 320ms and overlapped with the P50 component  
350 arising after 50ms from the onset of the second sound). This fact partially altered the contour  
351 of the ‘wavelets’ and made the interpretation of the parameters less straightforward.  
352 Nevertheless,  $x_0$  showed that the center of the ‘wavelets’ was progressively shifted over time



353 following the onset of the sounds. Moreover,  $a$  indicated a trend of decreased absolute value  
354 over time, coherently with the reduced amplitude of the ‘wavelets’ occurring for the last sounds  
355 of the pattern.

356

357 Finally, **Fig. 2G** illustrates that while the ‘wavelet’ response to the first sound showed very  
358 similar activity over primary (*parcel i*) and secondary auditory cortices, insula, hippocampal  
359 areas (*parcel ii*) and cingulate (*parcel iii*), the peaks for the following sounds showed a different  
360 trend, especially in response to the third and fourth object of the pattern. In this case, secondary  
361 auditory cortices, insula, hippocampal areas and cingulate seemed to peak before the primary  
362 auditory cortex. However, this does not indicate a faster response of those areas as it could be  
363 thought at a first sight. Indeed, looking, for example, at the peaks around 0.5 seconds (first red  
364 square in **Fig. 2G**), the first peak (mainly occurring for secondary auditory cortices, insula,  
365 hippocampal areas and cingulate) corresponded to the P300 component to the second sound of  
366 the pattern, while the second peak (mainly occurring for primary auditory cortex) was the P50  
367 to the third sound. An analogous phenomenon happened for the following objects of the pattern  
368 (as outlined by the other red squares). This shows that while the contribution of the primary  
369 auditory cortex was stronger for the first components (i.e. P50 and N100), which indexed  
370 lower-level processes, later components such as P300 were mainly generated by higher order  
371 areas such as secondary auditory cortices, insula, hippocampal areas and cingulate.

372

## 373 ***Discussion***

374 In this study, combining MEG and MRI, we discovered and mathematically modelled an  
375 inedited dual simultaneous processing responsible for brain recognition of temporal patterns.  
376 Indeed, on the one hand the single objects forming the pattern were independently elaborated  
377 by a rapid (theta band), oscillatory, local processing driven by sensorial cortices.  
378 On the other hand, the combination of the single objects into a meaningful superordinate  
379 pattern depended on a simultaneous global, slow (delta band) processing involving a  
380 widespread network of sequentially active high-order brain areas.

381

382 Our findings revealed that the dual simultaneous processing required by the brain to recognize  
383 temporal patterns involved a widespread network of brain areas largely related to memory,  
384 attention, audition, and decision-making. Such brain areas were hippocampus<sup>34</sup>, cingulate  
385 gyrus<sup>35</sup>, inferior temporal cortex<sup>36</sup>, frontal operculum<sup>37,38</sup>, insula<sup>39</sup>, and primary and  
386 secondary auditory cortex<sup>40</sup>. Notably, both processes (global and local) involved  
387 approximately the same brain regions but depended on different frequencies of the neural  
388 signal. Furthermore, as conceivable, the local processing relied mainly on sensorial cortices  
389 (e.g. auditory cortex), while the global processing presented a wider recruitment of higher-  
390 order brain areas such as cingulate, inferior temporal cortex and hippocampus.

391 Strikingly, temporal pattern recognition occurred through a cascade of progressively slower  
392 events rewiring a chain of low- to high-order brain regions, as formally described by our  
393 modelling. This evidence, observed for delta band, may indicate that the brain progressively  
394 constructs a meaningful understanding of the unfolding temporal pattern by recruiting a  
395 hierarchical pathway of subsequently active regions. Conversely, theta band activity showed a  
396 complementary profile. Indeed, its activity peaked slightly after each object of the temporal  
397 sequence. Such evidence suggests that, while delta band may be implicated in achieving a  
398 comprehensive understanding of the whole pattern (global processing), theta may elaborate  
399 independently its objects (local processing). Notably, previous research described global and  
400 local processing mainly in terms of different locations of the neural signal (i.e. primary  
401 sensorial cortices preceded higher-order brain areas in the elaboration of incoming stimuli  
402 <sup>16,17</sup>). Conversely, in our study we showed that the same brain regions operated these two  
403 processes (global and local) at the same time, using two concurrent frequency bands.

404 Further, previous research on memory for music and auditory sequences showed the  
405 involvement of large brain networks<sup>23–26</sup>, but did not reveal any dual simultaneous processing  
406 nor detailly described the dynamical, rapid change of the brain areas' activity in relation to the  
407 development of the auditory stimuli. Moreover, the majority of such studies employed fMRI,  
408 a powerful tool which returns excellent spatial resolution but lacks temporal accuracy<sup>41</sup>. On  
409 another note, recent studies on musical memory benefitting from the excellent temporal  
410 resolution of MEG focused on different features of memory, mainly investigating working  
411 memory paradigms and retention of musical information<sup>42,43</sup>. In conclusion, on the one hand  
412 our study highly confirmed and refined classic results on auditory and musical memory. On  
413 the other hand, it proposed a novel mechanism used by the brain to extract meaning from  
414 temporal sequences, shedding new light on the brain strategies to process, and become aware  
415 of the complexity of the external environment.

416 Another crucial evidence emerged from our study relates to the differential strength of the brain  
417 signal observed for the two frequency bands in relation to our experimental conditions (M and  
418 N). Indeed, while delta band presented a stronger power for the memorized patterns, theta  
419 showed greater responses for the novel ones. This finding may be seen in light of the predictive  
420 coding theory<sup>44,45</sup>, which posits that the brain is constantly updating internal models to predict  
421 environmental information. Here, when the brain is recognizing the temporal patterns (e.g.  
422 around tones number two and three of our sequences), it might formulate better predictions of  
423 the upcoming, previously memorized, objects completing the patterns. Thus, such objects  
424 would require a lower local processing, as we observed experimentally. Interestingly, although  
425 mainly localized in primary auditory cortex, the neural sources of theta band activity were also  
426 placed in hippocampal areas, secondary auditory cortex, insula, and cingulate. As previously  
427 mentioned, this evidence suggests that roughly the same brain regions generated two  
428 simultaneous frequency bands characterized by a very different functional profile, indexing the  
429 local and global processing of the temporal pattern. On top of this, with regards to local  
430 processing, our results show that the elaboration of each sound gave rise to a wavelet-like  
431 timeseries with three main peaks (components). Here, the lower-level elaboration of the sounds  
432 indexed by the first components (i.e. P50 and N100<sup>46</sup>) originated mainly in the primary  
433 auditory cortex. Conversely, later components such as P300<sup>46</sup> were generated especially by  
434 higher order areas such as secondary auditory cortices, insula, hippocampal regions and  
435 cingulate. Remarkably, such phenomenon became more evident following the unfolding of the

436 temporal pattern, suggesting that a progressively more refined elaboration of the single objects  
437 is essential for the brain to comprehend the meaning of the whole temporal pattern.

438 Finally, our findings related and expanded concepts of the notorious two-stream hypothesis of  
439 the brain <sup>47,48</sup>. Such conceptualization proposed two main pathways for high-order elaboration  
440 of visual and auditory information. On the one hand, the ventral stream leads from sensorial  
441 areas (e.g. visual and auditory cortices) to the medial temporal lobe, processing features mainly  
442 associated to object recognition <sup>48,49</sup>. On the other hand, the dorsal stream brings information  
443 from sensory cortices to the parietal lobe, elaborating spatial features of the stimuli <sup>50</sup>.  
444 Coherently with such hypothesis, our results highlighted several brain regions of the ventral  
445 stream that are implicated in recognition processes, such as hippocampal areas, frontal  
446 operculum, and inferior temporal cortex. Remarkably, our results further expanded previous  
447 knowledge on the two-stream hypothesis by providing at least three crucial remarks. The brain  
448 recognition of temporal patterns presented unique spatial-temporal features which were not  
449 shared with the identification of single elements or synchronous patterns (i). In addition to the  
450 brain regions involved in the two-stream hypothesis, our findings showed the privileged role  
451 of cingulate gyrus to achieve temporal pattern recognition (ii). Finally, the recognition of  
452 sequential patterns unfolding over time involved a dual simultaneous processing of the same  
453 objects, which the brain interpreted concurrently as individual pieces of information (local  
454 processing) and elementary parts of a larger reality (global processing) (iii).

455  
456 In conclusion, in our study we achieved a rather profound understanding of the brain  
457 mechanisms underlying conscious recognition of temporal patterns. Indeed, we discovered and  
458 mathematically modelled a rapid (theta band), oscillatory, local processing driven by sensorial  
459 cortices responsible for the elaboration of the single objects (sounds) forming the pattern.  
460 Additionally, our findings suggested that the combination of such single objects into a  
461 meaningful superordinate pattern depended on a simultaneous global, slow (delta band)  
462 processing involving a widespread network of sequentially active high-order brain areas. By  
463 showing that nearly the same brain regions operated two processes at the same time using two  
464 concurrent frequency bands, our results unravelled the brain mechanisms underlying temporal  
465 pattern recognition and proposed a novel understanding of the strategies adopted by the brain  
466 to elaborate the complexity of the external environment.

467

468

## 469 **Methods**

470

### 471 **Participants**

472 The study comprised 70 volunteers: 36 males and 34 females (age range: 18 – 42 years old,  
473 mean age:  $25.06 \pm 4.11$  years). All participants were healthy and reported no previous or  
474 current alcohol and drug abuse. Moreover, they were not under any kind of medication,  
475 declared that they did not have any previous neurological or psychiatric disorder, and reported  
476 to have normal hearing. Furthermore, their economic, educational and social status was  
477 homogeneous.

478 All the experimental procedures were carried out complying with the Declaration of Helsinki  
479 – Ethical Principles for Medical Research and were approved by the Ethics Committee of the  
480 Central Denmark Region (De Videnskabetiske Komitéer for Region Midtjylland) (Ref 1-10-  
481 72-411-17).

482

### 483 **Experimental design and stimuli**

484 To detect the brain signature of temporal pattern recognition, we used an old/new paradigm<sup>51</sup>  
485 auditory recognition task during magnetoencephalography (MEG) recording. First,  
486 participants listened to four repetitions of a MIDI homo-rhythmic version of the right-hand part  
487 of the whole prelude BWV 847 in C minor composed by J.S. Bach (total duration of about 10  
488 minutes). Second, they were presented with 80 brief musical excerpts lasting 1250 ms each and  
489 were asked to state whether each excerpt belonged to the prelude by Bach ('memorized' pattern  
490 (M), old) or it was a variation of the original patterns ('novel' pattern (N), new) (**Fig. 1A**).  
491 Forty excerpts were taken from the Bach's piece and 40 were novel. In the following analysis  
492 we used only the correctly recognized trials (mean correct M:  $78.15 \pm 13.56$  %, mean reaction  
493 times (RT):  $1871 \pm 209$  ms; mean correct N:  $81.43 \pm 14.12$  %, mean RT:  $1915 \pm 135$  ms). Both  
494 prelude and excerpts were created by using Finale (MakeMusic, Boulder, CO) and presented  
495 with Presentation software (Neurobehavioural Systems, Berkeley, CA). After the acquisition  
496 of the MEG data, in the same or another day, participants' brain structural images were  
497 acquired by using magnetic resonance imaging (MRI).

498

### 499 **Data acquisition**

500 We acquired both MRI and MEG data in two independent sessions. The MEG data was  
501 acquired by employing an Elekta Neuromag TRIUX system (Elekta Neuromag, Helsinki,

502 Finland) equipped with 306 channels. The machine was positioned in a magnetically shielded  
503 room at Aarhus University Hospital, Denmark. Data was recorded at a sampling rate of 1000  
504 Hz with an analogue filtering of 0.1–330 Hz. Prior to the measurements, we accommodated  
505 the sound volume at 50 dB above the minimum hearing threshold of each participant.  
506 Moreover, by utilizing a three-dimensional digitizer (Polhemus Fastrak, Colchester, VT, USA),  
507 we registered the participant's head shape and the position of four headcoils, with respect to  
508 three anatomical landmarks (nasion, and left and right preauricular locations).

509 The location of the headcoils was registered during the entire recording by using a continuous  
510 head position identification (cHPI), allowing us to track the exact head location within the  
511 MEG scanner at each time-point. We utilized this data to perform an accurate movement  
512 correction at a later stage of the data analysis.

513 The recorded MRI data corresponded to the structural T1. The acquisition parameters for the  
514 scan are reported as follows: voxel size = 1.0 x 1.0 x 1.0 mm (or 1.0 mm<sup>3</sup>); reconstructed matrix  
515 size 256×256; echo time (TE) of 2.96 ms and repetition time (TR) of 5000 ms and a bandwidth  
516 of 240 Hz/Px. At a later stage of the analysis, each individual T1-weighted MR scan was co-  
517 registered to the standard MNI brain template through an affine transformation and then  
518 referenced to the MEG sensors space by using the Polhemus head shape data and the three  
519 fiducial points measured during the MEG session.

520

## 521 **Data pre-processing**

522 The raw MEG sensor data (204 planar gradiometers and 102 magnetometers) was pre-  
523 processed by MaxFilter<sup>52</sup> for attenuating the interference originated outside the scalp by  
524 applying signal space separation. Within the same session, Maxfilter also adjusted the signal  
525 for head movement and down-sampled it from 1000 Hz to 250 Hz.

526 The data was converted into the SPM format and further analyzed in Matlab (MathWorks,  
527 Natick, Massachusetts, United States of America) by using OSL, a freely available toolbox that  
528 relies on a combination of FSL<sup>53</sup>, SPM<sup>54</sup> and Fieldtrip<sup>55</sup>, as well as in-house-built functions.

529 The data was then high-pass filtered (0.1 Hz threshold) to remove frequencies that were too  
530 low for being originated by the brain. A notch filter (48-52 Hz) was applied to correct for  
531 possible interference of the electric current. The data was further down-sampled to 150 Hz and  
532 few parts of the data, altered by large artifacts, were removed after visual inspection. Then, to  
533 discard the interference of eyeblinks and heart-beat artefacts from the brain data, independent  
534 component analysis (ICA) was used to decompose the original signal in independent  
535 components. Then, the components that picked up eyeblink and heart-beat activities were first



536 isolated and then discarded. The signal was rebuilt by using the remaining components <sup>56</sup> and  
537 then epoched in 80 trials (one for each musical excerpt) lasting 3500 ms each (with 100ms of  
538 pre-stimulus time that was used for baseline correction) (**Fig. 1B**).

539

#### 540 **Univariate tests and Monte-Carlo simulations over MEG sensors**

541 Although our primary focus was on the MEG source reconstructed brain data, a first analysis  
542 on MEG sensors data was computed, coherently with state-of-the-art recommendation about  
543 best practice in MEG analysis <sup>57</sup>.

544 Thus, according to a large number of MEG and electroencephalography (EEG) task-related  
545 studies <sup>57</sup>, we averaged the trials over conditions, obtaining two final mean trials, for M and N,  
546 respectively. Then, we combined each pair of planar gradiometers by root sum square.  
547 Afterwards, we performed a t-test for each time-point in the time-range 0 – 2.500 seconds and  
548 each combined planar gradiometer, contrasting M vs N. To correct for multiple comparisons,  
549 we computed Monte-Carlo simulations (MCS) <sup>58</sup> with 1000 permutations on the clusters of  
550 significant results emerged from the t-tests. We considered significant the original clusters that  
551 had a size bigger than the 99.9% maximum cluster sizes of the permuted data. Additional  
552 details on this widely used procedure can be found in Bonetti and colleagues <sup>29,30</sup>. This analysis  
553 returned a large and robust difference between experimental conditions. Moreover, the brain  
554 activity recorded over the MEG channels forming the significant cluster outputted by the MCS  
555 analysis outlined a timeseries which presented two main frequency components. As shown in  
556 **Fig. S1A**, the faster frequency component peaked after the presentation of each of the objects  
557 forming the pattern, while the slower frequency component accompanied the whole pattern,  
558 peaking at its end. This evidence was further supported by the computation of complex Morlet  
559 wavelet transform <sup>59</sup> on all MEG sensor data, which highlighted the main contribution of 1Hz  
560 and 4Hz to the MEG signal recorded during the task (**Fig. S1B**). Thus, our following analyses  
561 in source reconstructed space focused on two frequency bands defined around those main  
562 frequencies: 0.1-1Hz and 2-8Hz. These bands roughly corresponded to the well-known brain  
563 waves called delta and theta, respectively <sup>60</sup>, and were also coherent with results reported by  
564 Bonetti et al. <sup>29</sup>. Importantly, we hypothesized that they indexed the two main processes  
565 involved in our experimental task: processing of single objects forming the temporal pattern (*i*  
566 - *local processing*) and recognizing the temporal pattern as a comprehensive superordinate  
567 object (*ii - global processing*).

568

569

## 570 Source reconstruction

571 MEG is a powerful tool to record whole-brain activity with excellent temporal resolution.  
572 However, the investigation of neural activity also requires spatial parameters. To achieve a  
573 reasonably accurate information about the brain sources that generated the MEG signal, an  
574 inverse problem must be solved. Indeed, from MEG recording we know the power of the neural  
575 signal outside the head, but we do not know which brain sources generated it. Moreover, we  
576 possess only 102 triplets of MEG sensors, while the active brain sources that could be distinctly  
577 recorded by the MEG are much more numerous. To solve this problem, state-of-the-art source  
578 reconstruction methods have been used (**Fig. 1C** and **Fig. 2A**)<sup>61,62</sup>. Importantly, the source  
579 reconstruction algorithm has been computed independently for the two frequency bands  
580 involved in the study (0.1 – 1 Hz and 2 – 8 Hz (**Fig. 1C**)). Specifically, the following steps were  
581 implemented. First, the continuous data (before the epoching) was band-pass filtered into the  
582 two frequency bands. Second, the filtered data (independently for the two bands) was epoched.  
583 Third, the epoched data was submitted to the source reconstruction algorithm described below.  
584 Such algorithm involves two subsequent steps: (i) designing a forward model; (ii) computing  
585 the inverse solution. The forward model is a theoretical model which considers each brain  
586 source as an active dipole and describes how the unitary strength of such dipole would be  
587 reflected over all MEG sensors (in our case we utilized both magnetometers and planar  
588 gradiometers)<sup>62</sup>. Here, we employed an 8-mm grid which returned 3559 dipole locations  
589 (voxels) within the whole brain. After co-registering individual structural T1 data with fiducials  
590 (information about head landmarks), the forward model was computed by adopting a widely  
591 used method called “Single Shell”, presented in details by<sup>63</sup>. The output of such computation,  
592 also referred to as leadfield model, was stored in matrix  $L$  (sources x MEG channels). In the  
593 few cases where structural T1 was not available, we performed the leadfield computation using  
594 a template (MNI152-T1 with 8-mm spatial resolution).  
595 The second step of the source reconstruction is to compute the inverse solution (i.e. to estimate  
596 the generators of the neural signal on the basis of the brain activity recorded with MEG). In  
597 our study, we chose the beamforming, which is one of the most popular and effective  
598 algorithms available in the field<sup>61,62</sup>. This procedure uses a different set of weights sequentially  
599 applied to the source locations for isolating the contribution of each source to the activity  
600 recorded by the MEG channels for each time-point<sup>61,64</sup>. On a more technical level, the inverse  
601 solution based on beamforming can be described by the following main steps.  
602 First, the data recorded by MEG sensors ( $B$ ) at time  $t$ , can be described by the following  
603 equation (1):



604

$$B_{(t)} = L * Q_{(n_i,t)} + \mathcal{E} \quad (1)$$

605

606 Where  $L$  is the above-described leadfield model,  $Q$  is the dipole matrix carrying the activity of  
607 each active dipole ( $q$ ) over time and  $\mathcal{E}$  is noise (see Huang and colleagues<sup>65</sup> for more details).  
608 Thus, to solve the inverse problem, we have to compute  $Q$ . Using the beamforming, such  
609 procedure revolves around the computation of weights that are applied to the MEG sensors at  
610 each time-point, as shown for the single dipole  $q$  in equation (2):

611

$$q_{(t)} = W^T * B_{(t)} \quad (2)$$

612

613 Indeed, to gain  $q$ , the weights  $W$  should be computed (the subscript  $T$  refers to transpose  
614 matrix). To do so, the beamforming relies on the matrix multiplication between  $L$  and the  
615 covariance matrix between MEG sensors ( $C$ ), computed on the concatenated experimental  
616 trials. Specifically, for each brain source  $n$ , the weights  $W_n$  are computed as follows:

617

$$W_{(n)} = (L_{(n)}^T * C^{-1} * L_{(n)})^{-1} * L_{(n)}^T * C^{-1} \quad (3)$$

618

619 To be noted, the computation of the leadfield model was done for the three main orientations  
620 of each brain source (dipole), according to Nolte<sup>63</sup>. However, before computing the weights,  
621 the orientations have been reduced to one by using the singular value decomposition algorithm  
622 on the matrix multiplication reported in equation (4). This procedure is widely adopted to  
623 simplify the beamforming output<sup>65,66</sup>.

624

$$L = svd(l^T * C^{-1} * l)^{-1} \quad (4)$$

625

626 Here,  $l$  represents the leadfield model with the three orientations, while  $L$  the resolved one-  
627 orientation model that was used in (3).

628 Finally, with regards to the coding implementation of such algorithms, we have used Matlab  
629 toolboxes such as OSL, FieldTrip, SPM (functions for MEEG preprocessing and SPM  
630 beamforming toolbox) and FSL. Moreover, those codes were complemented by in-house-built  
631 scripts and functions.

632 Importantly, as already highlighted above, the analyses reported in the following paragraphs  
633 have been computed independently for the two frequency bands considered in the study.

634

### 635 **Brain activity for each element of the temporal sequence**

636 First, we wanted to detect the brain activity underlying each object of our temporal patterns  
637 (**Fig. 1D, Fig. S2, Table 1 and Table S1**). Here, we computed the absolute value of the  
638 reconstructed time-series since we were interested in the absolute strength of the signal, and  
639 we wanted to avoid the sign ambiguity introduced by source reconstruction procedures.

640 To perform first-level analysis for each participant, we employed general linear models  
641 (GLMs). Such models were computed on the source reconstructed data for each time-point and  
642 brain source<sup>31</sup>. The GLMs returned the main effect (contrasts of parameters estimate (COPEs))  
643 of M and N as well as their contrast. These results were submitted to a second-level analysis,  
644 employing one-sample t-tests with spatially smoothed variance obtained with a Gaussian  
645 kernel (full-width at half-maximum: 50 mm)<sup>65</sup>.

646 Here, we were interested in observing the different brain activity underlying recognition of M  
647 vs N temporal sequence, independently for each frequency band and object forming the  
648 sequence (musical tone). Thus, we computed 10 (five tones x two frequency bands) cluster-  
649 based Monte-Carlo simulations (MCS) on the second level (group-level) analysis results  
650 averaged over the five time-windows corresponding to the duration of the musical tones. The  
651 MCS analysis comprises 1000 permutations and a cluster forming threshold of  $p < .05$  (from  
652 the second-level t-tests). Specifically, the MCS test consisted of detecting the spatial clusters  
653 of significant values in the original data. Then, such data was permuted and the spatial clusters  
654 of the permuted significant values were detected. This procedure was computed several times  
655 (e.g. 1000) and gave rise to a reference distribution of cluster sizes detected for each  
656 permutation. Finally, the original cluster sizes were compared to the reference distribution. The  
657 original clusters were considered significant if the cluster sizes of the permuted data were  
658 bigger than the original cluster sizes less times than the MCS  $\alpha$  level. In this case, since we  
659 computed the analysis 10 times, we corrected for multiple comparisons by dividing the  
660 standard MCS  $\alpha$  level (= .05) by 10, resulting in an updated MCS  $\alpha = .005$  (i.e. original clusters  
661 were significant if their sizes were larger than the 99.5% of the permuted cluster sizes).

662

663

664

665

## 666 **K-means functional clustering**

667 Contrasting the brain activity in response to each element (musical tone) forming the temporal  
668 sequence is an effective procedure to obtain a general understanding of the brain functioning  
669 underlying the discrete processing of the sequence.

670 However, this strategy does not fully benefit of the excellent temporal resolution of the MEG  
671 data and underestimate brain processes that may happen in between two or more objects of the  
672 sequence. Furthermore, computing contrasts for each time-point and brain source returns a  
673 large amount of data which is partially redundant and sometimes not straightforward to  
674 understand and ideal to mathematically model. Indeed, several brain sources are highly  
675 correlated because of both biological reasons involving large populations of neurons generating  
676 the signal and artificial source leakage introduced during the source reconstruction<sup>32</sup>. Thus,  
677 defining a functionally based parcellation of the brain may be of great importance when aiming  
678 to synthesize and mathematically describe the spatial extent of the active brain sources as well  
679 as their activity over time.

680 To overcome these issues, we adopted a so-called k-means functional clustering, consisting of  
681 a series of k-means clustering algorithms<sup>67</sup> performed on functional and spatial information of  
682 each of the reconstructed brain sources (voxels) timeseries.

683 Specifically, as a first step this algorithm computed a clustering on basic functional parameters  
684 such as peak values and the corresponding indices of the voxels timeseries. We refer to this  
685 step as *functional clustering*. This procedure returned a set of independent parcels grouped  
686 according to the functional profiles of the brain voxels. Indeed, such parcels could either  
687 contain voxels that peaked approximately at the same time (**Fig. 2B**, left) or with similar  
688 absolute strength (**Fig. 2B**, right). As conceivable, clustering on the maximum timeseries  
689 indices is suggested when the brain activity is localized in different regions at different times.  
690 Conversely, when the activity is highly correlated over most of the brain voxels, clustering  
691 should be done on maximum timeseries values and would help to identify the core generators  
692 of the neural signal. In this study, delta (global processing of the pattern) presented different  
693 peaks of activity shifted over time and thus was clustered considering the time-indices of such  
694 peaks. Differently, theta (local processing of the pattern) showed very correlated activity and  
695 was therefore clustered using the absolute values of such peak activity. As widely done in  
696 clustering analysis<sup>68</sup>, also in our case it was beneficial to compute the clustering algorithm on  
697 a sequential set of  $k$  clusters (from  $k = 2$  to  $k = 20$ ). Then, the best clustering solution was  
698 decided on the basis of well-known evaluation strategies (heuristics) such as the elbow  
699 method/rule<sup>69</sup> and the silhouette coefficient<sup>70</sup>. The elbow method consists in plotting the sum

700 of squared errors (SSE) of the elements belonging to the clusters with respect to the cluster's  
701 centroids, as a function of the progressively more numerous cluster solutions. Then, the method  
702 suggests to visually identify the “elbow” of the curve as the number of clusters to use. The  
703 silhouette coefficient is a value (ranging from -1 to +1) showing the similarity of an element  
704 with its own cluster (cohesion) when compared to other clusters (separation). A high silhouette  
705 coefficient value indicates that the element is well matched to its own cluster and poorly to the  
706 neighboring clusters. As conceivable, if most of the elements present a high value, the  
707 clustering configuration is appropriate. We reported a further graphical example of this method  
708 in **Fig. S3**.

709 Once the best functional clustering solution is decided, a second clustering with regards to  
710 spatial information should be computed (*spatial clustering*, **Fig. 2C**). Indeed, brain activity is  
711 mainly described by two parameters, spatial locations, and variation over time. Clustering the  
712 original brain voxels into distinct functional parcels may return large parcels involving a  
713 network of spatially separated brain areas that are e.g. active at the same time. Thus, to define  
714 a better parcellation, it is beneficial to conduct clustering analysis also on the spatial  
715 coordinates of each of the functional parcels. In our study, we considered the three-dimensional  
716 spatial coordinates (in MNI space) of the voxels forming each of the functional parcels. This  
717 clustering computation was performed for a sequential set of  $k$  clusters solutions (from  $k = 2$   
718 to  $k = 10$ ), for one parcel at a time. As for the functional clustering, we evaluated the best  
719 solution for the spatial clustering by using the elbow rule and the silhouette coefficient. The k-  
720 means functional clustering was complete once this procedure was performed on all functional  
721 parcels, suggesting an effective parcellation for the experimental task based on both functional  
722 and spatial information (examples are reported in **Fig. S4, Table S2 and S3** for 0.1-1 Hz and  
723 **Fig. S5, Table S4, S5 and S6** for 2-8 Hz). As a last step, the timeseries of the brain voxels  
724 belonging to each parcel were averaged together to provide a final timeseries for the parcel.

725 As follows, we provide a few conceptual remarks related to this algorithm and to the current  
726 study that should be highlighted.

727 First, the k-means functional clustering has to be computed on source reconstructed brain data.  
728 However, such data can be either the timeseries outputted by the source reconstruction or the  
729 timeseries of the statistics computed on the source reconstruction. Moreover, the algorithm can  
730 be computed independently for each participant or on the group level statistics. Further, the  
731 brain data in input can either be the broadband data or the data reconstructed in selected  
732 frequency bands. Moreover, in the likely case of having more than one experimental condition,  
733 as conceivable, the algorithm can be computed on each condition independently or on the

734 aggregated (e.g. averaged) conditions. The best procedure cannot be defined a priori for every  
735 study and highly depends on the specific aims of the project. In our case, since the main aim  
736 of the algorithm was to define functional parcellations with timeseries that best represented the  
737 brain functioning among the whole population, we decided to work on the group level statistics.  
738 With regards to experimental conditions, we have computed different runs of the k-means  
739 functional clustering. Indeed, to statistically compare the timeseries of each parcel for the two  
740 experimental conditions of our task, we performed the clustering algorithm on the main effects  
741 of the two conditions averaged together. Instead, when aiming to mathematically describe the  
742 timeseries of each parcel for a specific experimental condition (e.g. M), the clustering  
743 algorithm has been computed on such condition only. Further, in relation to the frequency  
744 bands, we performed one computation of the clustering algorithm for each of the two frequency  
745 bands involved in our study. In the case of 0.1-1 Hz, we worked with absolute values of the  
746 reconstructed brain sources timeseries since they did not present any complete cycle of the  
747 oscillation, considering their absolute strength as sufficient. Conversely, when dealing with 2-  
748 8 Hz, the timeseries presented several complete oscillations and thus computing their absolute  
749 values would lead to lose important information. We resolved the sign ambiguity introduced  
750 by the source reconstruction by referencing the sign of the timeseries to the well-known  
751 negative polarity of the N100 emerged in response to the first tone of the pattern. Then, we  
752 computed the statistics and the subsequent k-means functional clustering on the timeseries  
753 which maintained their original double polarity.

754 Second, when dealing with real data, an “ideal” clustering solution may often not be existent,  
755 and the elbow method and silhouette coefficients may return slightly contradictory results and  
756 controversial conclusions. This is a quite usual limitation of clustering algorithms that,  
757 however, should not be necessarily interpreted as a threatening issue. Indeed, for instance, if  
758 the elbow method and silhouette coefficients indicate as the best solutions a series e.g. three  
759 subsequent *ks* but without clearly stating one single *k*, it is reasonable to expect very similar  
760 results among the three different *k* solutions. Thus, although this would suggest that an ideal *k*  
761 is probably not existent, it should be noted that any different choice of the suggested *ks* should  
762 not lead to a huge affection or misinterpretation of the final results. On the contrary, stating  
763 that an “ideal” solution may often not exist does not mean that clustering algorithms will  
764 invariably return a valid output. Indeed, such techniques are designed to always provide results,  
765 even in the cases where there are no reasons for clustering the data. With regards to the brain,  
766 extremely poor clustering solutions would be achieved when brain sources are all very similar  
767 in terms of functional and spatial profile. This should not happen if the data is acquired with

768 properly designed experimental tasks, but it should always be born in mind as a realistic  
769 possibility. Importantly, in such a case, the elbow method and silhouette coefficients would not  
770 return any clear indication regarding the ideal number  $k$  of clusters and the clustering algorithm  
771 would therefore be highly not recommended.

772 Third, it is important to state that the clustering procedure that we described here has been  
773 developed for task-related MEG data and would not properly work for resting state scenarios  
774 where other algorithms such as principal component analysis (PCA)<sup>71</sup> may be more  
775 appropriate.

776 Fourth, to increase the strength of the clustering algorithm, it may be beneficial to zero the  
777 activity of few poorly active brain sources timeseries before computing the functional k-means  
778 clustering. This action would help the clustering procedure and may provide some beneficial  
779 effects for the definition of the functional parcellation.

780

### 781 **Contrasts over time for each parcel**

782 Here, the k-means functional clustering was performed on the group-level main effects of M  
783 and N averaged together. Then, to obtain the main effect of M and N for each parcel and  
784 participant, we averaged the first-level main effect of M and N (from the GLMs) over the brain  
785 voxels belonging to each of the functional parcels. This resulted in a new timeseries for each  
786 participant, functional parcel, and experimental condition (M and N). Such timeseries were  
787 submitted to univariate contrasts (M vs N; **Fig. 2D1**, methods, and **Fig. 2E, S6 and S7**, results).  
788 Specifically, for each parcel and time-point, we computed one two-sample t-test (threshold  $p$   
789  $< .05$ ) contrasting the main effect of M vs N. Then, we corrected for multiple comparison by  
790 using a two-dimensional MCS approach with 1000 permutations. First, temporal clusters of  
791 significant results emerged from the t-tests were individuated. Second, significant results were  
792 permuted along the time dimension and clusters of such permuted results were identified. This  
793 procedure was computed 1000 times, giving rise to a reference distribution of cluster sizes of  
794 permuted results. Such distribution has been compared with the clusters size of the original  
795 data. Significant clusters in the original data were the ones whose size was bigger than the  
796 99.9% of permuted cluster sizes (MCS  $p < .001$ ). More details on this widely adopted statistical  
797 procedure can be found in Bonetti and colleagues<sup>29,72</sup>. As done for the other analyses, such  
798 operation was observed for both frequency bands investigated in the study (**Fig. 2 and Table**  
799 **S7**).

800

801



## 802 Curve fitting

803 Besides comparing our two experimental conditions, a main aim of our study was to  
804 mathematically describe the timeseries of the brain activity associated to recognition of  
805 temporal patterns (**Fig. 2D2**, methods, and **Fig. 2F, S8** and **S9**, results). Indeed, we believe that  
806 to properly understand a scientific phenomenon, a mathematical description of such  
807 phenomenon should be provided, as commonly done in many branches of science. In addition,  
808 this procedure is a first essential step to develop future generative models that will not only  
809 describe the brain activity but simulate and perturbate its nature.

810 Thus, we computed another round of k-means functional clustering. This time, such analysis  
811 was performed only on the group-level main effect of M, to outline a functional parcellation  
812 based on the sole recognition of previously memorized patterns. Once again, this procedure  
813 was computed independently for the two frequency bands considered in the study.

814 Then, to describe the dual simultaneous brain processing happening during recognition of  
815 temporal patterns, we hypothesized two different mathematical equations (one for each  
816 frequency band).

817 Regarding the slower frequency band included in our study (0.1-1Hz), we used a simple  
818 Gaussian function, described as follows:

819

$$f(x) = ae^{\frac{(x-x_0)^2}{2\sigma^2}} \quad (5)$$

820

821 where  $a$  modulates the amplitude of the curve,  $x_0$  shifts it over time and  $\sigma$  determines its width.

822 In a few cases, we employed a modified version of the equation (5), which is basically a  
823 summation of three Gaussian functions shifted over time, as described as follows:

824

$$f(x) = \sum_{i=1}^3 a_i e^{\frac{(x-x_{0i})^2}{2\sigma_i^2}} \quad (6)$$

825

826

827 Arguably, this frequency indexed the recognition process of the full temporal pattern (global  
828 processing), as suggested by the brain areas involved and by the timing of their activations.

829 Conversely, with regards to the second frequency described in our study (2-8Hz) which  
830 supposedly reflected the brain processing of each object of the temporal sequence (local  
831 processing), we hypothesized the following equation:

832

833

$$f(x) = \sum_{i=1}^N a_i e^{-\frac{(\log(x)-x_{0i})^2}{2\sigma_i^2}} * \cos(cx + \varphi) \quad (7)$$

834

835 where  $a, x_0, \sigma$  describes a Gaussian function, exactly as reported for equation (5) and equation  
836 (6). However, in this case, the Gaussian function can be ‘skewed’ by  $\log(x)$  and is multiplied  
837 by a cosine function. This new equation gives rise to a sinusoidal curve that highly modulates  
838 its amplitude based on the associated Gaussian function. As usual, the parameter  $c$  refers to the  
839 angular frequency, while  $\varphi$  indicates the phase. Finally,  $N$  refers to the total number of objects  
840 (musical tone) forming the temporal pattern.

841 In all cases, the best parameters were fitted using the Python function `curve_fit`, which employs  
842 the widely adopted non-linear least squares method <sup>73</sup>. **Table 2** and **S8** reports the results of  
843 such analysis. In the few cases where no values are reported, the fitting of the equations were  
844 not possible since the timeseries referred to brain areas that were essentially not activate during  
845 our experimental tasks.

846



847 **Data availability**

848

849 The codes are available at the following link: <https://github.com/leonardob92/LBPD-1.0.git>,

850 while the multimodal neuroimaging data related to the experiment are available upon

851 reasonable request.

852

853

## 854 **Acknowledgements**

855

856 We thank Riccardo Proietti, Giulio Carraturo, Mick Holt, Holger Friis for their  
857 assistance in the neuroscientific experiment. We also thank the psychologist Tina Birgitte  
858 Wisbech Carstensen for her help with the administration of psychological tests and  
859 questionnaires and Francesco Carlomagno for his assistance with the display items of the  
860 paper. Furthermore, we thank the Linacre College in Oxford for its support to the author  
861 Leonardo Bonetti.

862 The Center for Music in the Brain (MIB) is funded by the Danish National Research  
863 Foundation (project number DNRF117).

864 LB is supported by the Carlsberg Foundation (CF20-0239) and by the Center for  
865 Music in the Brain.

866 MLK is supported by the ERC Consolidator Grant: CAREGIVING (n. 615539),  
867 Center for Music in the Brain, and Centre for Eudaimonia and Human Flourishing funded  
868 by the Pettit and Carlsberg Foundations.

869 GD is supported by the Spanish Research Project PSI2016-75688-P (AEI/FEDER,  
870 EU), by the European Union's Horizon 2020 Research and Innovation Programme under  
871 grant agreements n. 720270 (HBP SGA1) and n. 785907 (HBP SGA2), and by the Catalan  
872 AGAUR Programme 2017 SGR 1545.

873 Additionally, we thank the University of Bologna for the economic support provided  
874 to the author Giulia Donati and the student assistants Riccardo Proietti and Giulio Carraturo  
875 and the Italian section of *Mensa: The International High IQ Society* for the economic support  
876 provided to Francesco Carlomagno.

877

878

879

880

881 **Author contributions**

882

883 Conceptualization: LB, EB, MLK, PV; Methodology: LB, MLK, DP, GDE; Software: LB;

884 Analysis: LB; Investigation: LB, GDO; Resources: MLK, PV, EB, LB; Data curation: LB;

885 Writing - Original draft: LB; Writing – Review & editing: LB, SEPB, EB, DP, GDE, GDO,

886 PV; Visualization: LB, SEPB; Supervision: MLK, PV, DP, EB; Project administration: LB,

887 MLK, PV, EB; Funding acquisition: LB, PV, MLK.

888

889

890

891 **Competing interests statement**

892

893 The authors declare no competing interests.

894

895

896

897

898

899

## 900 *References*

901

- 902 1. Härdle, W. K., Lu, H. & Shen, X. *Handbook of Big Data Analytics. Springer Handbooks of Computational*  
903 *Statistics* (2018).
- 904 2. Bühlmann, P., Drineas, P., Kane, M. & Van der Laan, M. *Handbook of Big Data. Handbook of Big Data*  
905 (2016). doi:10.1002/sim.7076
- 906 3. Luchnikov, I. A., Vintskevich, S. V., Grigoriev, D. A. & Filippov, S. N. Machine Learning Non-Markovian  
907 Quantum Dynamics. *Phys. Rev. Lett.* (2020). doi:10.1103/PhysRevLett.124.140502
- 908 4. Neal, R. *et al.* Use of probabilistic medium- to long-range weather-pattern forecasts for identifying  
909 periods with an increased likelihood of coastal flooding around the UK. *Meteorol. Appl.* (2018).  
910 doi:10.1002/met.1719
- 911 5. Tyutyunov, Y. V. & Titova, L. I. Simple models for studying complex spatiotemporal patterns of animal  
912 behavior. *Deep. Res. Part II Top. Stud. Oceanogr.* (2017). doi:10.1016/j.dsr2.2016.08.010
- 913 6. Prabono, A. G., Lee, S. L. & Yahya, B. N. Context-based similarity measure on human behavior pattern  
914 analysis. *Soft Comput.* (2019). doi:10.1007/s00500-018-3198-6
- 915 7. Latacz, E. *et al.* Can medical imaging identify the histopathological growth patterns of liver metastases?  
916 *Semin. Cancer Biol.* (2021). doi:10.1016/j.semcancer.2020.07.002
- 917 8. Zheng, C., Xia, Y., Pan, Y. & Chen, J. Automated identification of dementia using medical imaging: a  
918 survey from a pattern classification perspective. *Brain Informatics* (2016). doi:10.1007/s40708-015-  
919 0027-x
- 920 9. Yan, X., Zimmermann, F. G. S. & Rossion, B. An implicit neural familiar face identity recognition  
921 response across widely variable natural views in the human brain. *Cogn. Neurosci.* (2020).  
922 doi:10.1080/17588928.2020.1712344
- 923 10. Wardle, S. G. & Baker, C. Recent advances in understanding object recognition in the human brain:  
924 Deep neural networks, temporal dynamics, and context. *F1000Research* (2020).  
925 doi:10.12688/f1000research.22296.1
- 926 11. Sedmak, G. & Judaš, M. White Matter Interstitial Neurons in the Adult Human Brain: 3% of Cortical  
927 Neurons in Quest for Recognition. *Cells* (2021). doi:10.3390/cells10010190
- 928 12. Seeliger, K. *et al.* Convolutional neural network-based encoding and decoding of visual object  
929 recognition in space and time. *Neuroimage* (2018). doi:10.1016/j.neuroimage.2017.07.018
- 930 13. Cichy, R. M., Pantazis, D. & Oliva, A. Resolving human object recognition in space and time. *Nat.*  
931 *Neurosci.* (2014). doi:10.1038/nn.3635
- 932 14. Haxby, J. V. *et al.* Face encoding and recognition in the human brain. *Proc. Natl. Acad. Sci. U. S. A.*  
933 (1996). doi:10.1073/pnas.93.2.922
- 934 15. Gomez, J. *et al.* Microstructural proliferation in human cortex is coupled with the development of face  
935 processing. *Science (80-. ).* (2017). doi:10.1126/science.aag0311
- 936 16. Qiu, F. T. & Von Der Heydt, R. Figure and ground in the visual cortex: V2 combines stereoscopic cues  
937 with Gestalt rules. *Neuron* (2005). doi:10.1016/j.neuron.2005.05.028
- 938 17. Ungerleider & Mishkin. Two Cortical Visual Systems. *Analysis of Visual Behavior* (1982).
- 939 18. Näätänen, R., Paavilainen, P., Rinne, T. & Alho, K. The mismatch negativity (MMN) in basic research of  
940 central auditory processing: a review. *Clin Neurophysiol* **118**, 2544–2590 (2007).
- 941 19. Quiroga-Martinez, D. R. *et al.* Reduced prediction error responses in high-as compared to low-  
942 uncertainty musical contexts. *Cortex* (2019). doi:10.1016/j.cortex.2019.06.010
- 943 20. Dehaene, S., Meyniel, F., Wacongne, C., Wang, L. & Pallier, C. The Neural Representation of Sequences:  
944 From Transition Probabilities to Algebraic Patterns and Linguistic Trees. *Neuron* (2015).

- 945 doi:10.1016/j.neuron.2015.09.019
- 946 21. Maess, B., Koelsch, S., Gunter, T. C. & Friederici, A. D. Musical syntax is processed in Broca's area: An  
947 MEG study. *Nat. Neurosci.* (2001). doi:10.1038/87502
- 948 22. Koelsch, S. *et al.* Differentiating ERAN and MMN: An ERP study. *Neuroreport* (2001).  
949 doi:10.1097/00001756-200105250-00019
- 950 23. Zatorre, R. J., Evans, A. C. & Meyer, E. Neural mechanisms underlying melodic perception and memory  
951 for pitch. *J. Neurosci.* (1994). doi:10.1523/jneurosci.14-04-01908.1994
- 952 24. Gaab, N., Gaser, C., Zaehle, T., Jancke, L. & Schlaug, G. Functional anatomy of pitch memory - An fMRI  
953 study with sparse temporal sampling. *Neuroimage* (2003). doi:10.1016/S1053-8119(03)00224-6
- 954 25. Kumar, S. *et al.* A brain system for auditory working memory. *J. Neurosci.* (2016).  
955 doi:10.1523/JNEUROSCI.4341-14.2016
- 956 26. Sikka, R., Cuddy, L. L., Johnsrude, I. S. & Vanstone, A. D. An fMRI comparison of neural activity  
957 associated with recognition of familiar melodies in younger and older adults. *Front. Neurosci.* (2015).  
958 doi:10.3389/fnins.2015.00356
- 959 27. Cross, I., Hallam, S. & Thaut, M. *The Oxford Handbook of Music Psychology. The Oxford Handbook of*  
960 *Music Psychology* (2008). doi:10.1093/oxfordhb/9780199298457.001.0001
- 961 28. Başar, E. & Güntekin, B. Review of delta, theta, alpha, beta, and gamma response oscillations in  
962 neuropsychiatric disorders. in *Supplements to Clinical Neurophysiology* (2013). doi:10.1016/B978-0-  
963 7020-5307-8.00019-3
- 964 29. Bonetti, L. *et al.* Spatiotemporal brain dynamics during recognition of the music of Johann Sebastian  
965 Bach. *bioRxiv* (2020). doi:10.1101/2020.06.23.165191
- 966 30. Bonetti, L. *et al.* Rapid encoding of temporal sequences discovered in brain dynamics. *bioRxiv* (2020).  
967 doi:10.1101/2020.12.11.421669
- 968 31. Hunt, L. T. *et al.* Mechanisms underlying cortical activity during value-guided choice. *Nat. Neurosci.*  
969 (2012). doi:10.1038/nn.3017
- 970 32. Colclough, G. L., Brookes, M. J., Smith, S. M. & Woolrich, M. W. A symmetric multivariate leakage  
971 correction for MEG connectomes. *Neuroimage* (2015). doi:10.1016/j.neuroimage.2015.03.071
- 972 33. Bridwell, D. A. *et al.* Moving beyond ERP components: A selective review of approaches to integrate  
973 EEG and behavior. *Frontiers in Human Neuroscience* (2018). doi:10.3389/fnhum.2018.00106
- 974 34. Knierim, J. J. The hippocampus. *Current Biology* (2015). doi:10.1016/j.cub.2015.10.049
- 975 35. Rolls, E. T. The cingulate cortex and limbic systems for emotion, action, and memory. *Brain Structure*  
976 *and Function* (2019). doi:10.1007/s00429-019-01945-2
- 977 36. Conway, B. R. The organization and operation of inferior temporal cortex. *Annual Review of Vision*  
978 *Science* (2018). doi:10.1146/annurev-vision-091517-034202
- 979 37. Behroozmand, R. *et al.* Sensory-motor networks involved in speech production and motor control: An  
980 fMRI study. *Neuroimage* (2015). doi:10.1016/j.neuroimage.2015.01.040
- 981 38. Indefrey, P. *et al.* A neural correlate of syntactic encoding during speech production. *Proc. Natl. Acad.*  
982 *Sci. U. S. A.* (2001). doi:10.1073/pnas.101118098
- 983 39. Uddin, L. Q. Salience processing and insular cortical function and dysfunction. *Nature Reviews*  
984 *Neuroscience* (2015). doi:10.1038/nrn3857
- 985 40. Elhilali, M., Fritz, J. B., Klein, D. J., Simon, J. Z. & Shamma, S. A. Dynamics of Precise Spike Timing in  
986 Primary Auditory Cortex. *J. Neurosci.* (2004). doi:10.1523/JNEUROSCI.3825-03.2004
- 987 41. Poldrack, R. A., Nichols, T. & Mumford, J. *Handbook of Functional MRI Data Analysis. Handbook of*  
988 *Functional MRI Data Analysis* (2011). doi:10.1017/cbo9780511895029
- 989 42. Albouy, P. *et al.* Impaired pitch perception and memory in congenital amusia: The deficit starts in the  
990 auditory cortex. *Brain* (2013). doi:10.1093/brain/awt082

- 991 43. Albouy, P., Weiss, A., Baillet, S. & Zatorre, R. J. Selective Entrainment of Theta Oscillations in the Dorsal  
992 Stream Causally Enhances Auditory Working Memory Performance. *Neuron* (2017).  
993 doi:10.1016/j.neuron.2017.03.015
- 994 44. Koelsch, S., Vuust, P. & Friston, K. Predictive Processes and the Peculiar Case of Music. *Trends in*  
995 *Cognitive Sciences* (2019). doi:10.1016/j.tics.2018.10.006
- 996 45. Friston, K. Predictive coding, precision and synchrony. *Cognitive Neuroscience* (2012).  
997 doi:10.1080/17588928.2012.691277
- 998 46. Coles, M. G. H. & Rugg, M. D. Event-related brain potentials: an introduction. in *Electrophysiology of*  
999 *Mind* (2008). doi:10.1093/acprof:oso/9780198524168.003.0001
- 1000 47. Whitwell, R. L., Milner, A. D. & Goodale, M. A. The two visual systems hypothesis: New challenges and  
1001 insights from visual form agnostic patient DF. *Frontiers in Neurology* (2014).  
1002 doi:10.3389/fneur.2014.00255
- 1003 48. Goodale, M. A. & Milner, A. D. Separate visual pathways for perception and action. *Trends in*  
1004 *Neurosciences* (1992). doi:10.1016/0166-2236(92)90344-8
- 1005 49. Weiller, C. *et al.* The ventral pathway of the human brain: A continuous association tract system.  
1006 *Neuroimage* (2021). doi:10.1016/j.neuroimage.2021.117977
- 1007 50. Arbib, M. A. Dorsal and ventral streams in the evolution of the language-ready brain: Linking language  
1008 to the world. *J. Neurolinguistics* (2017). doi:10.1016/j.jneuroling.2016.12.003
- 1009

## 1010 **References (Methods only)**

1011

- 1012 51. Kayser, J., Fong, R., Tenke, C. E. & Bruder, G. E. Event-related brain potentials during auditory and  
1013 visual word recognition memory tasks. *Cogn. Brain Res.* (2003). doi:10.1016/S0926-6410(02)00205-7
- 1014 52. Taulu, S. & Simola, J. Spatiotemporal signal space separation method for rejecting nearby interference  
1015 in MEG measurements. *Phys. Med. Biol.* (2006). doi:10.1088/0031-9155/51/7/008
- 1016 53. Woolrich, M. W. *et al.* Bayesian analysis of neuroimaging data in FSL. *Neuroimage* (2009).  
1017 doi:10.1016/j.neuroimage.2008.10.055
- 1018 54. Penny, W., Friston, K., Ashburner, J., Kiebel, S. & Nichols, T. *Statistical Parametric Mapping: The*  
1019 *Analysis of Functional Brain Images. Statistical Parametric Mapping: The Analysis of Functional Brain*  
1020 *Images* (2007). doi:10.1016/B978-0-12-372560-8.X5000-1
- 1021 55. Oostenveld, R., Fries, P., Maris, E. & Schoffelen, J. M. FieldTrip: Open source software for advanced  
1022 analysis of MEG, EEG, and invasive electrophysiological data. *Comput. Intell. Neurosci.* (2011).  
1023 doi:10.1155/2011/156869
- 1024 56. Mantini, D. *et al.* A signal-processing pipeline for magnetoencephalography resting-state networks.  
1025 *Brain Connect.* (2011). doi:10.1089/brain.2011.0001
- 1026 57. Gross, J. *et al.* Good practice for conducting and reporting MEG research. *NeuroImage* **65**, 349–363  
1027 (2013).
- 1028 58. Kroese, D. P., Taimre, T. & Botev, Z. I. *Handbook of Monte Carlo Methods. Handbook of Monte Carlo*  
1029 *Methods* (2011). doi:10.1002/9781118014967
- 1030 59. Daubechies, I. *Ten Lectures on Wavelets. Ten Lectures on Wavelets* (1992).  
1031 doi:10.1137/1.9781611970104
- 1032 60. Başar, E. A review of alpha activity in integrative brain function: Fundamental physiology, sensory  
1033 coding, cognition and pathology. *International Journal of Psychophysiology* (2012).  
1034 doi:10.1016/j.ijpsycho.2012.07.002
- 1035 61. Hillebrand, A. & Barnes, G. R. Beamformer Analysis of MEG Data. *International Review of Neurobiology*  
1036 (2005). doi:10.1016/S0074-7742(05)68006-3
- 1037 62. Huang, M. X., Mosher, J. C. & Leahy, R. M. A sensor-weighted overlapping-sphere head model and  
1038 exhaustive head model comparison for MEG. *Phys. Med. Biol.* (1999). doi:10.1088/0031-  
1039 9155/44/2/010
- 1040 63. Nolte, G. The magnetic lead field theorem in the quasi-static approximation and its use for  
1041 magnetoencephalography forward calculation in realistic volume conductors. *Phys. Med. Biol.* (2003).  
1042 doi:10.1088/0031-9155/48/22/002
- 1043 64. Brookes, M. J. *et al.* Beamformer reconstruction of correlated sources using a modified source model.  
1044 *Neuroimage* (2007). doi:10.1016/j.neuroimage.2006.11.012
- 1045 65. Huang, M. X. *et al.* Commonalities and Differences among Vectorized Beamformers in Electromagnetic  
1046 Source Imaging. *Brain Topogr.* (2004). doi:10.1023/B:BRAT.0000019183.92439.51
- 1047 66. Woolrich, M., Hunt, L., Groves, A. & Barnes, G. MEG beamforming using Bayesian PCA for adaptive  
1048 data covariance matrix regularization. *Neuroimage* (2011). doi:10.1016/j.neuroimage.2011.04.041
- 1049 67. Sinaga, K. P. & Yang, M. S. Unsupervised K-means clustering algorithm. *IEEE Access* (2020).  
1050 doi:10.1109/ACCESS.2020.2988796
- 1051 68. Garcia-Dias, R., Vieira, S., Lopez Pinaya, W. H. & Mechelli, A. Clustering analysis. in *Machine Learning:*  
1052 *Methods and Applications to Brain Disorders* (2019). doi:10.1016/B978-0-12-815739-8.00013-4
- 1053 69. Liu, F. & Deng, Y. Determine the Number of Unknown Targets in Open World Based on Elbow Method.  
1054 *IEEE Trans. Fuzzy Syst.* (2021). doi:10.1109/TFUZZ.2020.2966182



- 1055 70. Al-Zoubi, M. B. & Al Rawi, M. An efficient approach for computing silhouette coefficients. *J. Comput.*  
1056 *Sci.* (2008). doi:10.3844/jcssp.2008.252.255
- 1057 71. Vidal, R., Ma, Y. & Sastry, S. S. Principal component analysis. in *Interdisciplinary Applied Mathematics*  
1058 (2016). doi:10.1007/978-0-387-87811-9\_2
- 1059 72. Bonetti, L. *et al.* Brain predictive coding processes are associated to COMT gene Val158Met  
1060 polymorphism. *Neuroimage* (2021). doi:10.1016/j.neuroimage.2021.117954
- 1061 73. Stratiev, D. *et al.* Non-linear least-squares methods for modelling vacuum residue hydrocracking. *Oxid.*  
1062 *Commun.* (2021).
- 1063
- 1064
- 1065
- 1066
- 1067
- 1068

1069 ***SUPPLEMENTARY MATERIALS***

1070

1071 As follows, supplementary materials related to this study and organized as supplementary  
1072 figures (i) and tables (ii). In the cases when the supplementary tables were too large to be  
1073 conveniently reported in the current document, they have been reported in Excel files that can  
1074 be found at the following link:

1075 <https://www.dropbox.com/sh/sax1yzjqn897hxm/AAC8hWFE8IcyJgRCrJ2gu-bNa?dl=0>)

1076

1077

1078

1079

1080

1081

1082

1083 **SUPPLEMENTARY FIGURES**

1084

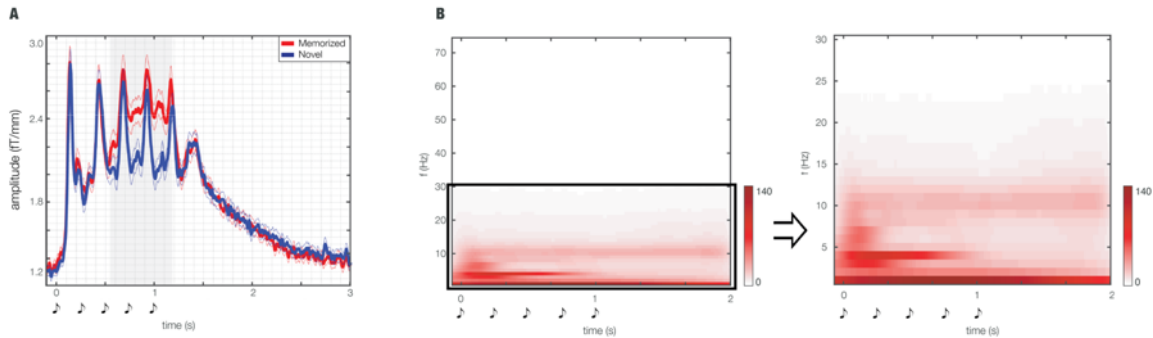

1085

1086 **Fig. S1. MEG sensors waveform and power spectra**

1087 The left plot shows the significantly different brain activity during recognition of ‘memorized’ vs ‘novel’ temporal  
1088 sequences. The waveforms represent the average over the combined planar gradiometers forming the significant  
1089 cluster emerged from the analysis, while the grey area illustrates the temporal extent of such significant difference.  
1090 The complementary two plots show the power spectra computed by using complex Morlet wavelet transform on  
1091 all MEG channels. The two plots illustrate the power spectra computed for progressively narrower bands.  
1092 Together with the waveforms, these plots highlight the main contribution of the two frequency bands analyzed in  
1093 the study: 0.1-1 Hz and 2-8 Hz (roughly corresponding to the well-known brain waves named delta and theta,  
1094 respectively).

1095

1096

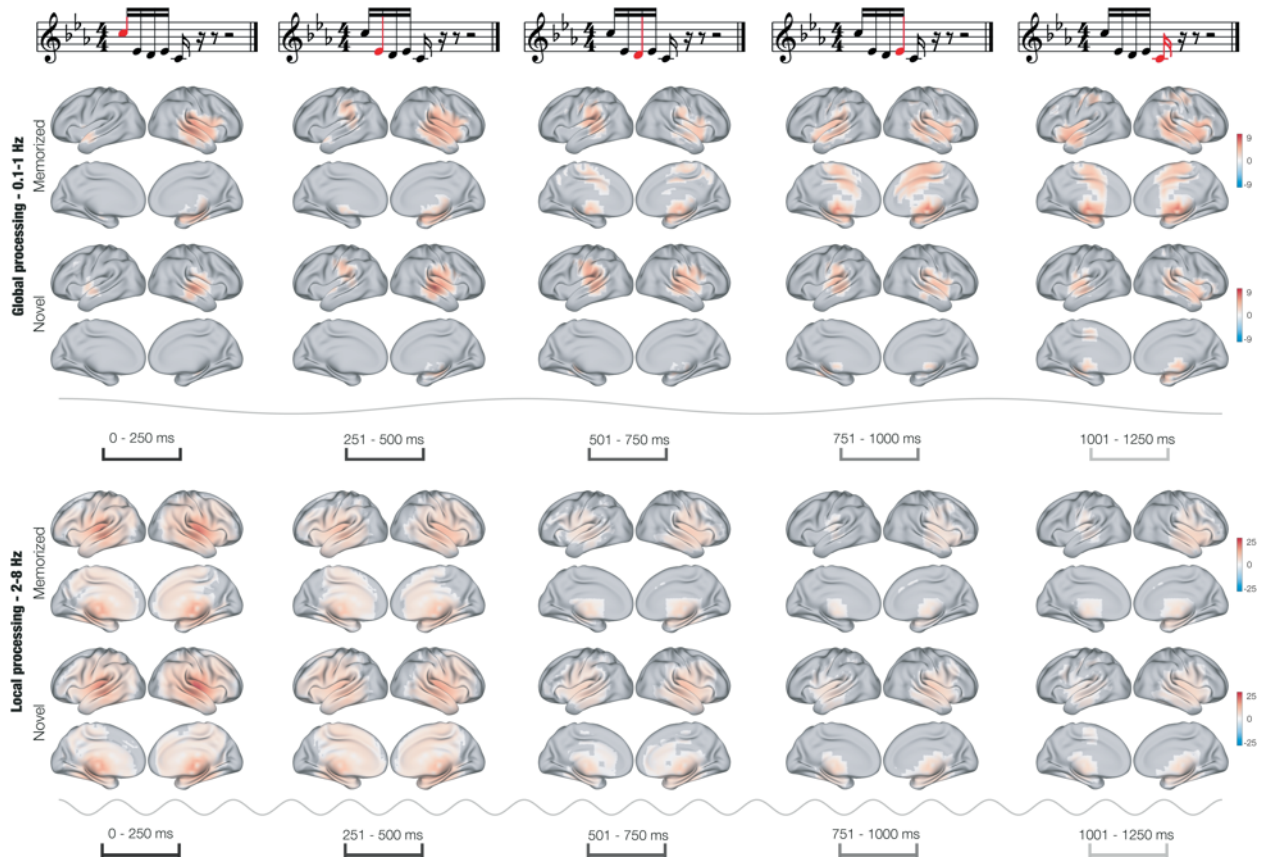

1097

1098 **Fig. S2. Brain activity underlying the single objects of the temporal patterns**

1099 Significant clusters of brain activity reconstructed in the time-windows corresponding to the five objects of the  
1100 temporal patterns (as illustrated in the first row by the red tones). The brain activity shows the main effects for  
1101 our experimental conditions ('memorized' and 'novel') and frequency bands (0.1-1Hz and 2-8Hz). The colorbars  
1102 indicate one-sample t-values computed for each spatial location and time-point and then corrected with cluster-  
1103 based permutation tests.

1104

1105

1106

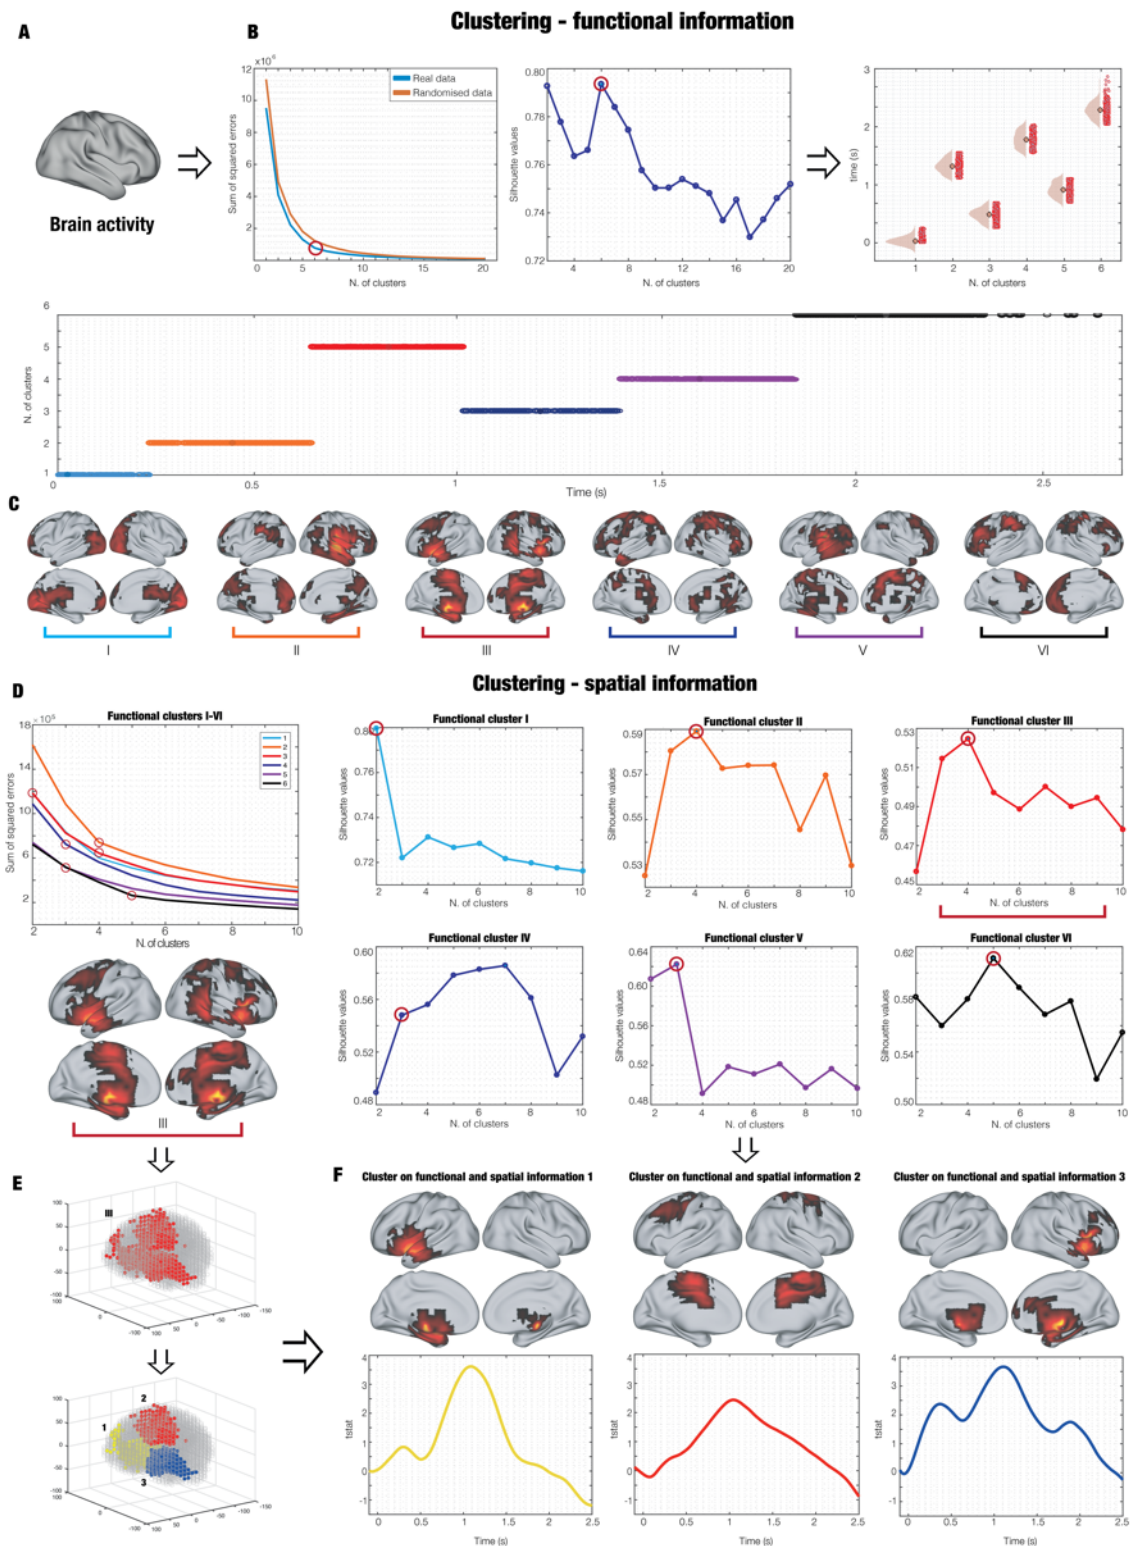

1107

1108 **Fig. S3. Description of the k-means functional clustering** (A) The brain activity is recorded during the  
 1109 recognition of temporal patterns. Such activity, reconstructed in 3559 brain sources, is the input for the k-means  
 1110 functional clustering to define a discrete functionally based parcellation. (B) A functional k-means clustering is  
 1111 performed. Such procedure consists of computing a series of  $k$  k-means clustering solutions (e.g. from  $k = 2$  to  $k$

1112 = 20) on the functional profile of the brain sources timeseries. In our study, we proposed two simple functional  
1113 features: the time-index of the peak activity or the actual peak activity value of each brain source timeseries. The  
1114 example reported in the figure shows clustering on time-indices of peak activity. The first plot shows the heuristic  
1115 named elbow rule which helps to define the best  $k$  solution by plotting the sequential sum of squared errors (SSE)  
1116 of the different cluster solutions (with  $k = 2:20$ ). Here, it is visible how the SSE reduces its change rate around  $k$   
1117 = 6 (as indicated by the circle). Notably, when computing k-means clustering on randomized data, the SSE is  
1118 higher for randomized vs real data, especially around  $k = 6$ , suggesting that the real data should be indeed clustered  
1119 in six different clusters. As an alternative, the subsequent plot shows the Silhouette value for each  $k$ , representing  
1120 how well each element (brain source time-index) is representative of the cluster to which it belongs. Ideally, those  
1121 two heuristics should be considered together to define the best  $k$ . The plot on the right shows the brain source  
1122 peak value indices in a violin-scatter fashion, while the plot below provides the same information with time on  
1123 the x-axis and different colors for the six identified clusters to increase readability. **(C)** Brain representation of  
1124 functional k-means clustering results (functional brain parcels). **(D)** A spatial k-means clustering is performed on  
1125 each of the functional brain parcels to define a final parcellation considering both brain functional and spatial  
1126 information. This procedure uses k-means clustering on the spatial coordinates of each of the brain sources  
1127 belonging to each functional parcel (as shown especially by the plot of the elbow rule for all the six functional  
1128 parcels). Then, to provide a specific example, the figure focuses on the third functional parcel (indicated by the  
1129 red brace), whose plots for Silhouette heuristics are reported. **(E)** Graphical depiction of spatial parcels  
1130 computation (bottom plot) for the third functional parcel (top plot). **(F)** Example of few final 'k-means functional'  
1131 parcels and corresponding timeseries, obtained by averaging the timeseries of each brain source belonging to the  
1132 parcel.

1133  
1134  
1135



1136

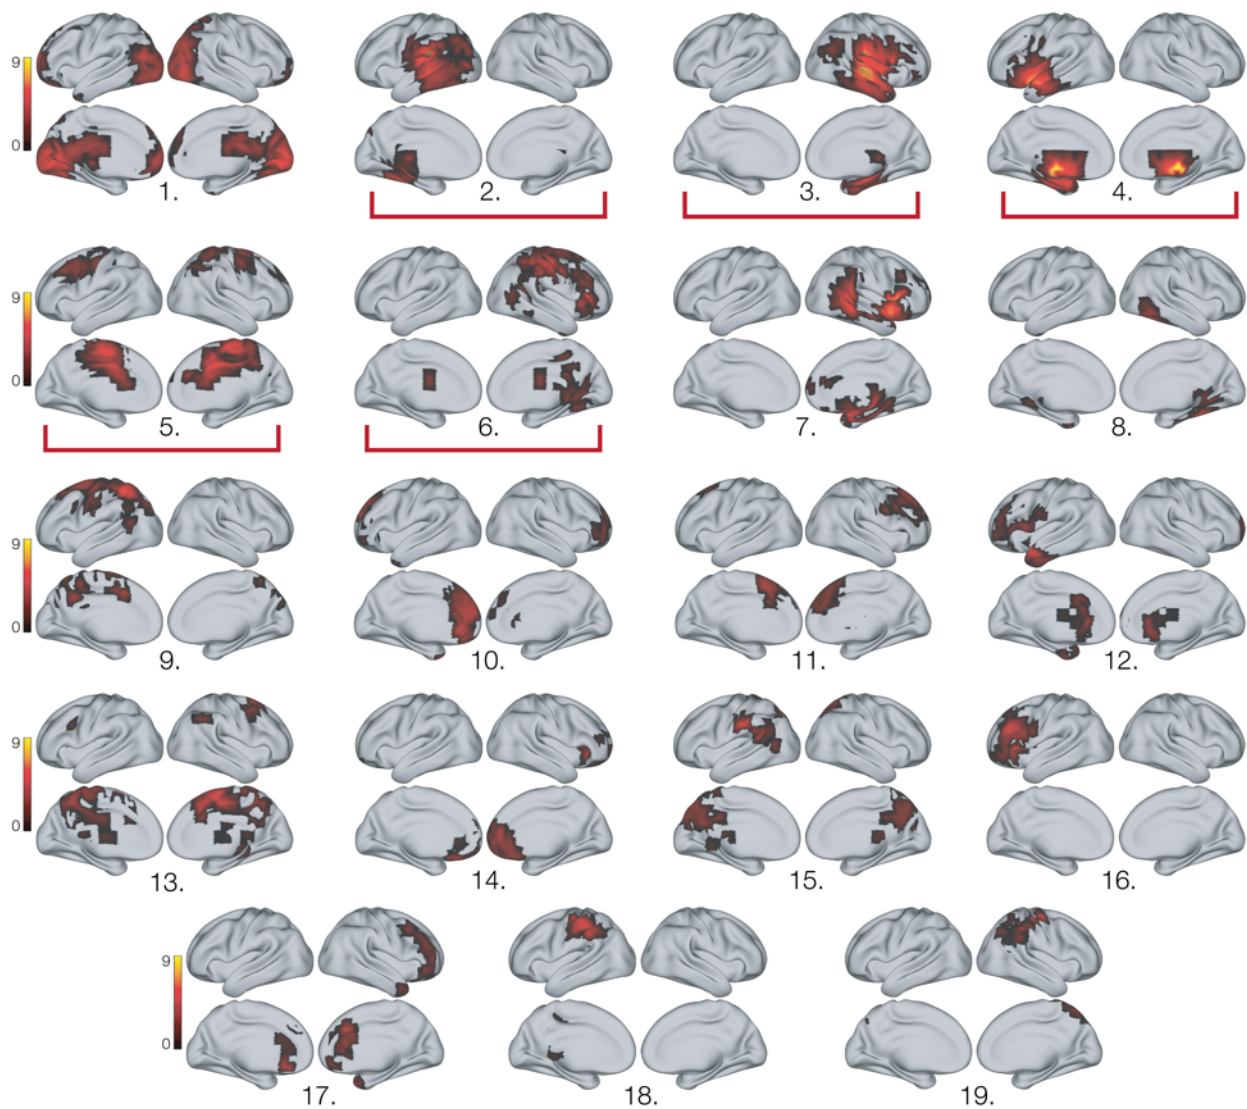

1137

1138 **Fig. S4. Functional parcellation for 0.1-1 Hz frequency band**

1139 Full parcellation returned by the k-means functional clustering computed on the indices of the brain activity peaks  
1140 of all 3559 brain reconstructed sources. This parcellation was computed for the brain activity underlying  
1141 recognition of memorized temporal patterns. The red brackets show the parcels that are reported in Fig. 2.

1142

1143

1144



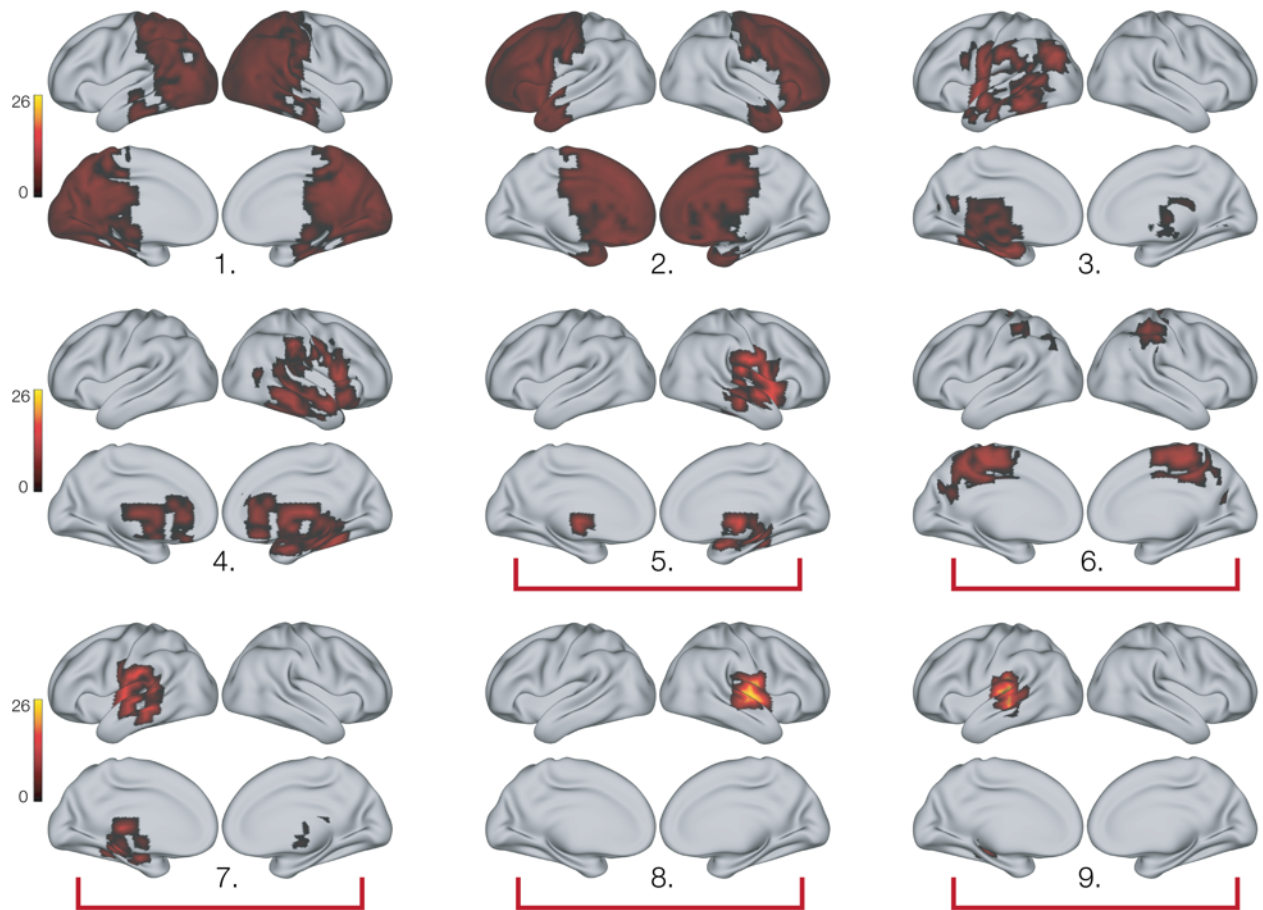

1145

1146

1147 **Fig. S5. Functional parcellation for 2-8 Hz frequency band**

1148 Full parcellation returned by the k-means functional clustering computed on the brain activity peak values of the  
1149 timeseries of all 3559 brain reconstructed sources. This parcellation was computed for the brain activity  
1150 underlying recognition of memorized temporal patterns. The red brackets show the parcels that are reported in

1151 **Fig. 2.**

1152

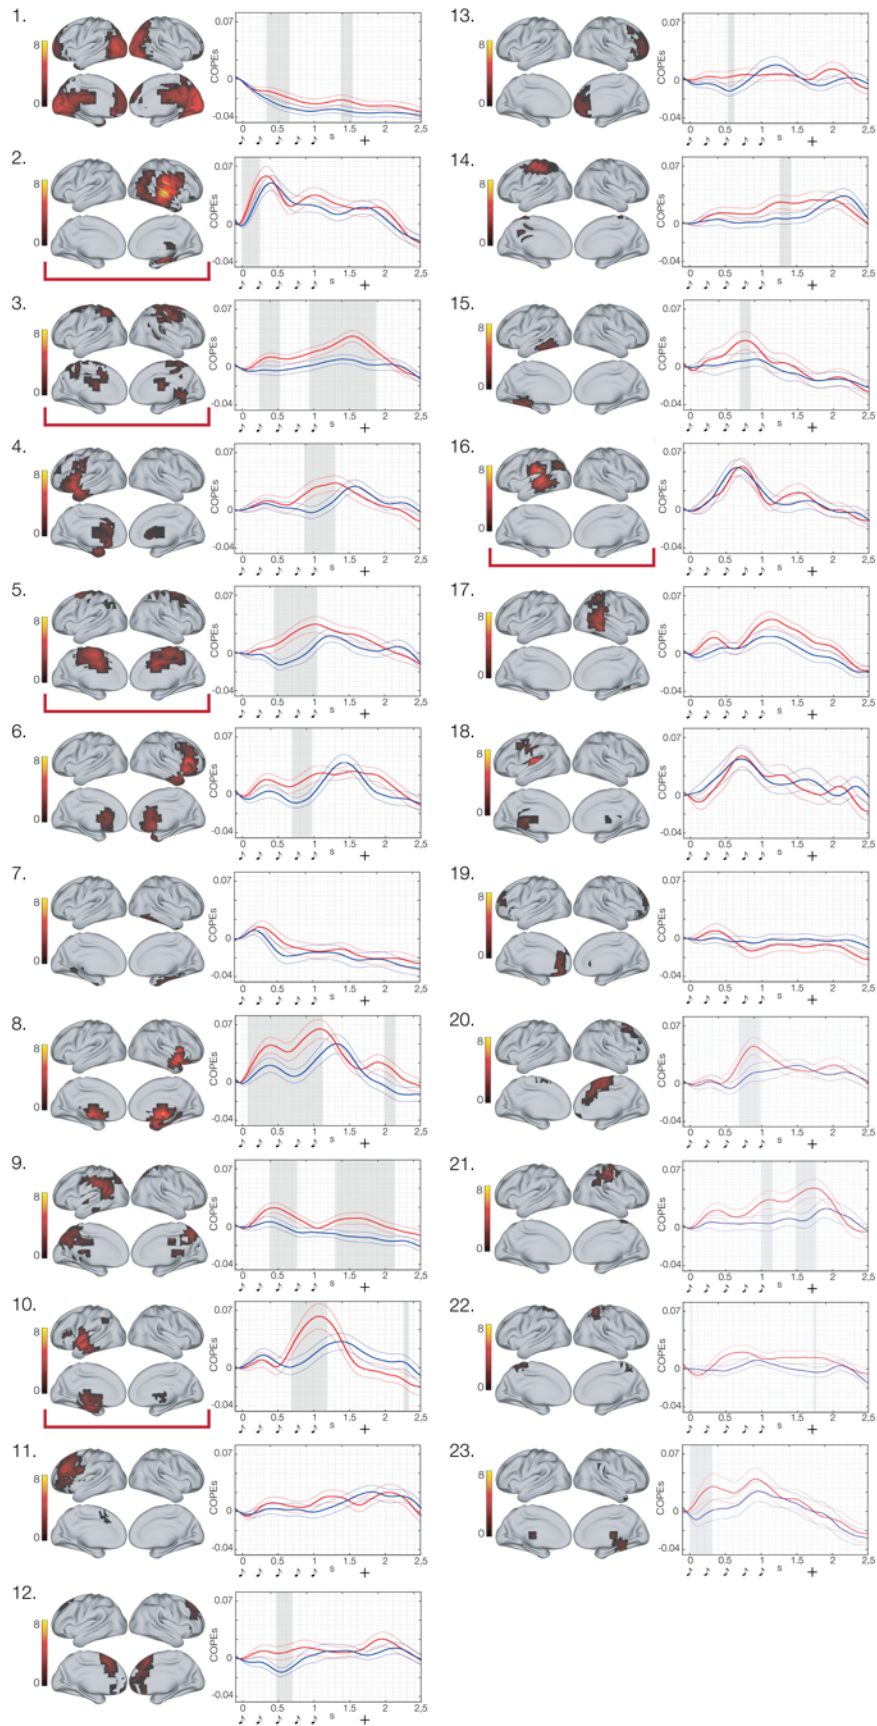

1153

1154 Fig. S6. Full-parcellation contrasts between 'memorized' vs 'novel' temporal patterns in 0.1-1 Hz

1155 Full parcellation and corresponding timeseries returned by the k-means functional clustering computed on the  
1156 indices of the brain activity peaks of all 3559 brain reconstructed sources. In this case, the parcellation was  
1157 computed for the averaged brain activity underlying recognition of ‘memorized’ and ‘novel’ temporal patterns.  
1158 The brain parcels are numbered progressively with decreasing size (i.e. number of brain sources belonging to each  
1159 parcel). The graphical depiction of musical tones indicates the onset of the objects forming the temporal pattern,  
1160 while the ‘+’ shows the mean reaction time of participants’ response. Grey areas illustrate the significantly different  
1161 time-windows between M and N. In the waveform plots, the solid line corresponds to the mean brain activity,  
1162 while the dash line to the correspondent standard errors. The red brackets show the parcels that are reported in  
1163 **Fig. 2.**  
1164

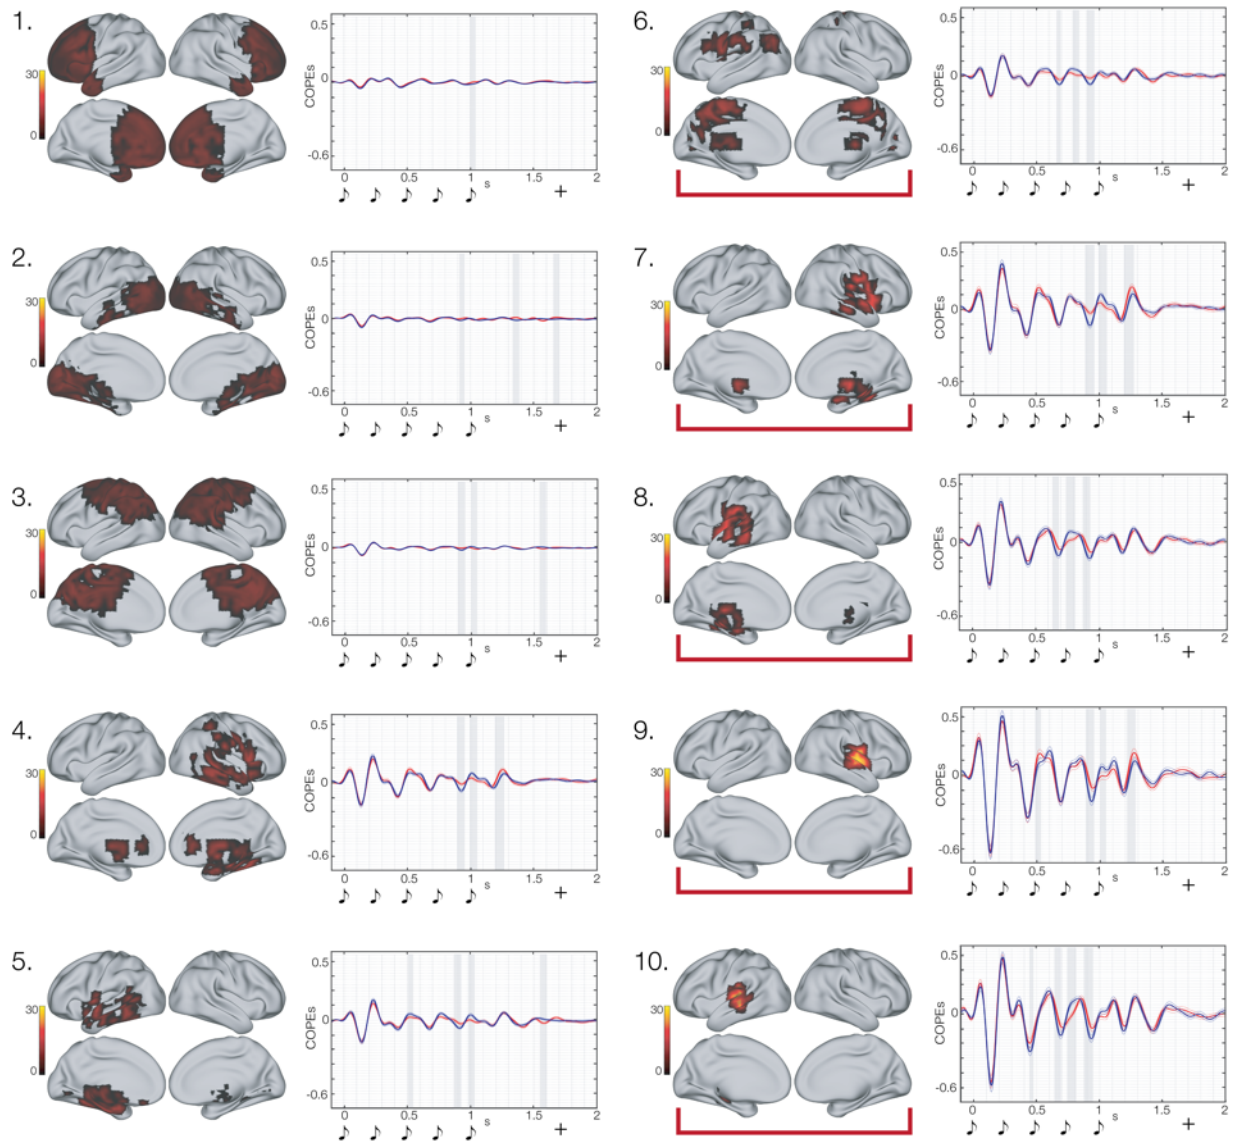

1165

1166 **Fig. S7. Full-parcellation contrasts between 'novel' vs 'memorized' temporal patterns in 2-8 Hz**

1167 Full parcellation and corresponding timeseries returned by the k-means functional clustering computed on the  
1168 brain activity peak values of the timeseries of all 3559 brain reconstructed sources. In this case, the parcellation  
1169 was computed for the averaged brain activity underlying recognition of 'memorized' and 'novel' temporal  
1170 patterns. The brain parcels are numbered progressively with decreasing size (i.e. number of brain sources  
1171 belonging to each parcel). The graphical depiction of musical tones indicates the onset of the objects forming the  
1172 temporal pattern, while the '+' shows the mean reaction time of participants' response. Grey areas illustrate the  
1173 significantly different time-windows between N and M. In the waveform plots, the solid line corresponds to the  
1174 mean brain activity, while the dash line to the correspondent standard errors. The red brackets show the parcels  
1175 that are reported in Fig. 2.

1176

1177



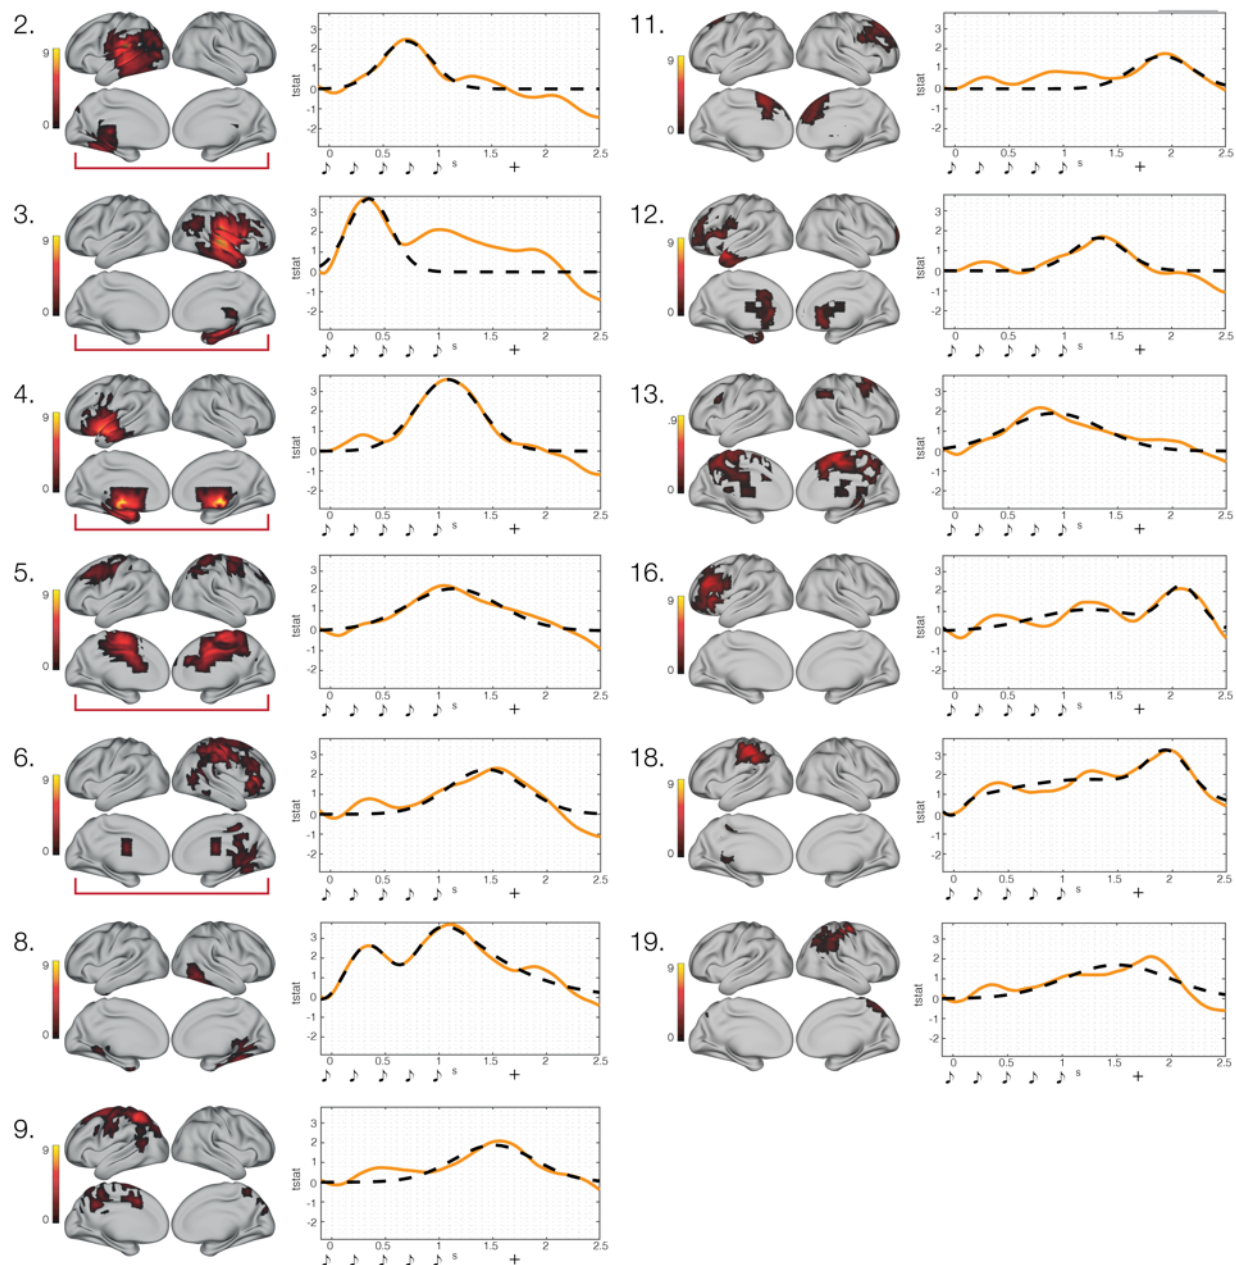

1178

1179 **Fig. S8. Full-parcellation fitting for 'memorized' temporal patterns in 0.1-1 Hz**

1180 All parcels whose timeseries were describable by a Gaussian function are reported in this figure. In a few cases,  
1181 it was not possible to fit the equations since the timeseries showed a very small and scattered activity over time.  
1182 This happened when those brain areas were not involved in the experimental task. For instance, this was the case  
1183 of a large occipital parcel that, as conceivable, did not play any role in recognition of auditory sequences. The  
1184 depicted parcels and corresponding timeseries were returned by the k-means functional clustering computed on  
1185 the indices of the brain activity peaks of all 3559 brain reconstructed sources. This parcellation was computed for  
1186 the brain activity underlying recognition of memorized temporal patterns (see Methods for details). The brain  
1187 parcels are numbered progressively with decreasing size (i.e. number of brain sources belonging to each parcel).  
1188 The graphical depiction of musical tones indicates the onset of the objects forming the temporal pattern, while the  
1189 '+' shows the mean reaction time of participants' response. In the waveform plots, the solid line corresponds to the

1190 actual brain activity, while the dash line to the predicted timeseries obtained by using non-linear least square  
1191 fitting. The red brackets show the parcels that are reported in **Fig. 2**.  
1192  
1193  
1194

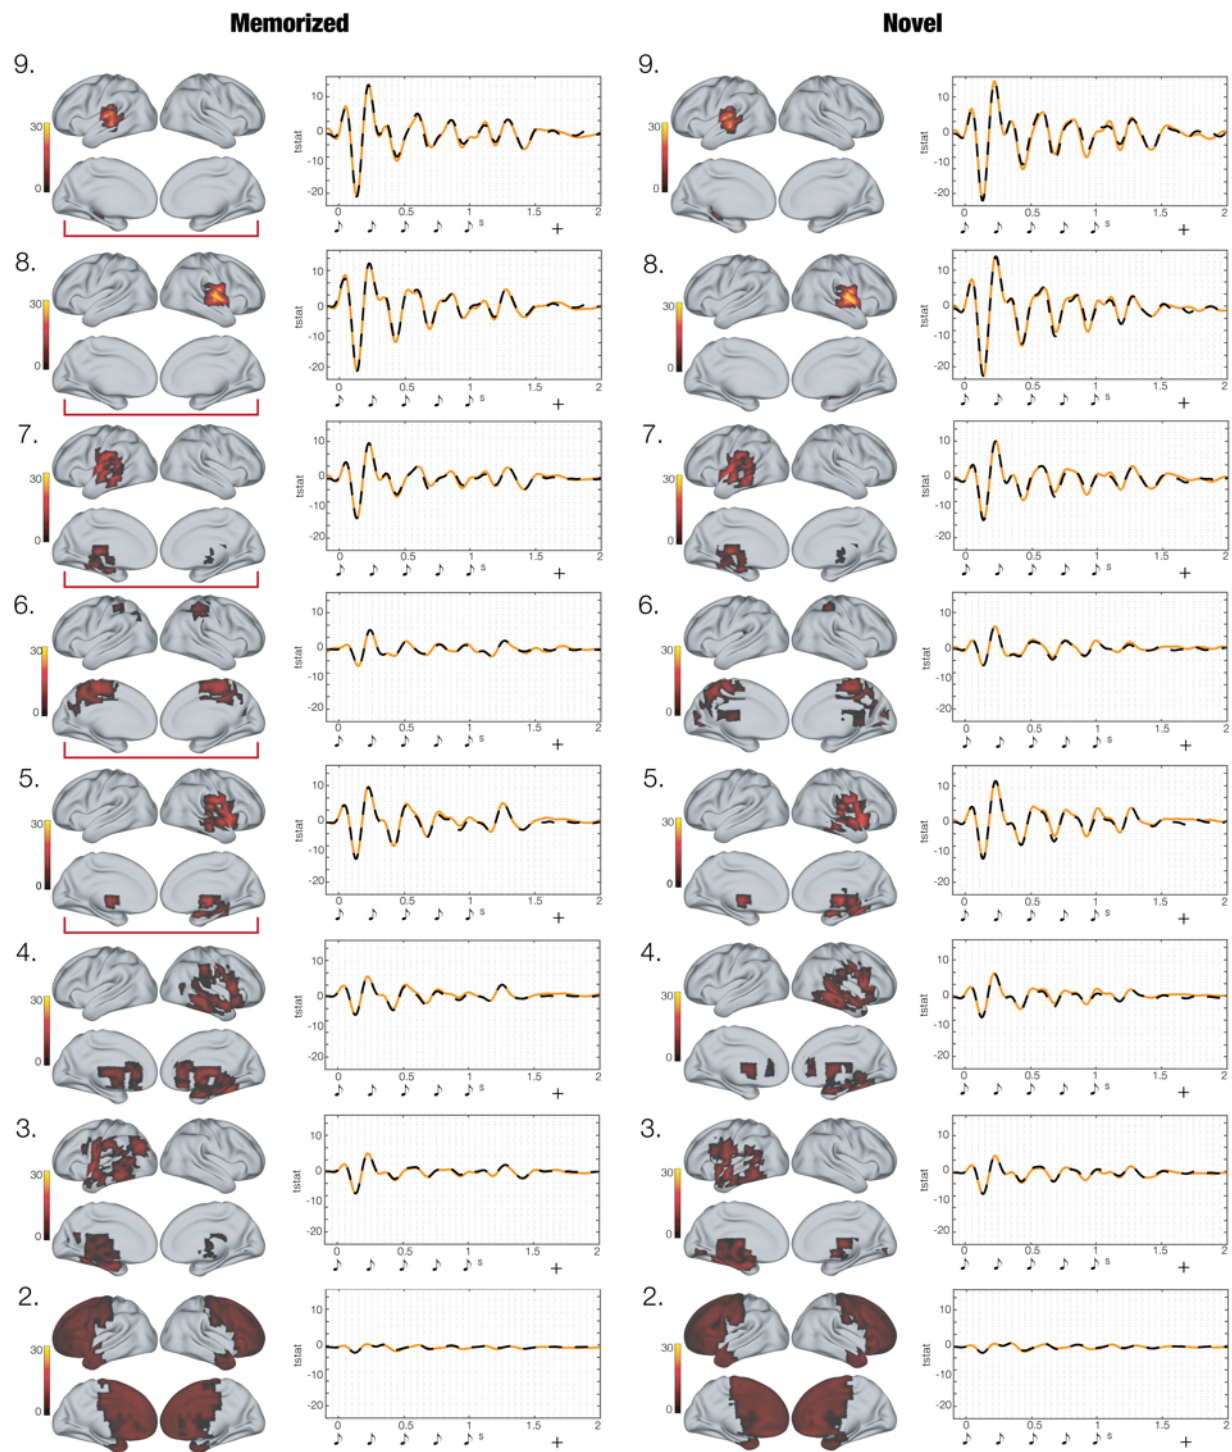

1195

1196 **Fig. S9. Full-parcellation fitting for ‘memorized’ and ‘novel’ temporal patterns in 2-8 Hz**

1197 All parcels whose timeseries were describable by a skewed Gaussian function multiplied by a sinusoidal function  
1198 are reported in this figure. Only in one case which regarded a large occipital parcel, it was not possible to fit the  
1199 equation since the timeseries showed a very small and scattered activity over time. This happened since, as  
1200 conceivable, the occipital cortex did not play any role in the processing and recognition of auditory sequences.  
1201 The depicted parcels and corresponding timeseries were returned by the k-means functional clustering computed  
1202 on the brain activity peak values of the timeseries of all 3559 brain reconstructed sources. The two parcellations  
1203 reported in the figure were computed for the brain activity underlying the recognition of either the ‘memorized’



1204 (left column) or the ‘novel’ temporal patterns (right column) (see Methods for details). The brain parcels are  
1205 numbered progressively with decreasing size (i.e. number of brain sources belonging to each parcel). The  
1206 graphical depiction of musical tones indicates the onset of the objects forming the temporal pattern, while the ‘+’  
1207 shows the mean reaction time of participants’ response. In the waveform plots, the solid line corresponds to the  
1208 actual brain activity, while the dash line to the predicted timeseries obtained by using non-linear least square  
1209 fitting. The red brackets show the parcels that are reported in **Fig. 2**.  
1210

1211 **SUPPLEMENTARY TABLES**

1212

1213

1214 **Table S1. Brain activity underlying recognition of temporal patterns (single-object)**

1215 Extensive brain sources activity underlying recognition of each object (musical tone) of the temporal patterns.  
1216 Results are reported for recognition of ‘memorized’ (M) and ‘novel’ (N) sequences independently as well as for  
1217 their contrasts. Brain areas refer to the automatic anatomic labelling (AAL) parcellation labels, while t indicates  
1218 the t-value obtained by contrasting M vs N temporal sequences.

1219

1220 **Table S2. Functionally-based parcellation for recognition of ‘memorized’ patterns – 0.1-1 Hz**

1221 Description of the brain sources belonging to each of the parcels returned by the k-means functional clustering.  
1222 For each source, the table reports a descriptive label (referring to automatic anatomic labelling (AAL)  
1223 parcellation), hemisphere, MNI coordinates, and maximum t-value registered in the source timeseries.

1224

1225 **Table S3. Functionally-based parcellation for recognition of ‘memorized’ and ‘novel’ patterns – 0.1-1 Hz**

1226 Description of the brain sources belonging to each of the parcels returned by the k-means functional clustering.  
1227 In this case, the clustering algorithm has been performed on the brain activity averaged over experimental  
1228 conditions (‘memorized’ and ‘novel’). For each source, the table reports a descriptive label (referring to automatic  
1229 anatomic labelling (AAL) parcellation), hemisphere, MNI coordinates, and maximum t-value registered in the  
1230 source timeseries.

1231

1232 **Table S4. Functionally-based parcellation for recognition of ‘memorized’ patterns – 2-8 Hz**

1233 Description of the brain sources belonging to each of the parcels returned by the k-means functional clustering  
1234 performed for ‘memorized’ patterns. For each source, the table reports a descriptive label (referring to automatic  
1235 anatomic labelling (AAL) parcellation), hemisphere, MNI coordinates, and maximum t-value registered in the  
1236 source timeseries.

1237

1238 **Table S5. Functionally-based parcellation for recognition of ‘novel’ patterns – 2-8 Hz**

1239 Description of the brain sources belonging to each of the parcels returned by the k-means functional clustering  
1240 performed for ‘novel’ patterns. For each source, the table reports a descriptive label (referring to automatic  
1241 anatomic labelling (AAL) parcellation), hemisphere, MNI coordinates, and maximum t-value registered in the  
1242 source timeseries.

1243

1244 **Table S6. Functionally-based parcellation for recognition of ‘memorized’ and ‘novel’ patterns – 2-8 Hz**

1245 Description of the brain sources belonging to each of the parcels returned by the k-means functional clustering.  
1246 In this case, the clustering algorithm has been performed on the brain activity averaged over experimental  
1247 conditions (‘memorized’ and ‘novel’). For each source, the table reports a descriptive label (referring to automatic  
1248 anatomic labelling (AAL) parcellation), hemisphere, MNI coordinates, and maximum t-value registered in the  
1249 source timeseries.

1250

1251 **Table S7. Brain activity underlying recognition of temporal patterns (k-means functional clustering)**

1252 Contrasts between brain activity underlying recognition of ‘memorized’ vs ‘novel’ temporal patterns. Here, the  
1253 contrasts have been performed on the timeseries of the parcels returned by the k-means functional clustering  
1254 computed on the brain activity averaged over experimental conditions. The table provides results for both  
1255 frequencies (0.1-1. Hz and 2-8 Hz). Further, for each parcel, it reports size ( $k$ ),  $p$ -value corrected by Monte-Carlo  
1256 simulations, temporal extent, and averaged  $t$ -value of the significant clusters.

1257

1258 **Table S8. Fitted coefficients over all parcels’ timeseries (non-linear least square)**

1259  $R^2$  and coefficients derived from non-linear least square fitting of the equations (5), (6) and (7) reported in the  
1260 Methods section on the brain activity underlying temporal pattern recognition. In a few cases, it was not possible  
1261 to fit the equation since the timeseries showed a very small and scattered activity over time. This happened when  
1262 those brain areas were not involved in the experimental task. For instance, this was the case of a large occipital  
1263 parcel that, as conceivable, did not play any role in recognition of auditory sequences. The reported parcels were  
1264 returned by the k-means functional clustering computed either on the indices or on the actual brain activity  
1265 maximum values of all 3559 brain reconstructed sources. This parcellation was computed for the brain activity  
1266 underlying recognition of ‘memorized’ temporal patterns for 0.1-1 Hz and ‘novel’ temporal patterns for 2-8 Hz  
1267 only (see Methods for details).

1268

1269

1270

1271

1272

1273

1274

1275
